# Supplementary material for: Electrochemical aminotrifluoromethylation of unactivated alkenes with Langlois’ reagent as the CF3 source
Source: Royal Society of Chemistry journal article supplement (doi:10.1039/d3nj04705a), 2023-12-26

## Supporting Information

# Electrochemical Aminotrifluoromethylation of Unactivated Alkenes with Langlois' Reagent as the CF<sub>3</sub> Source

Tongshun An,<sup>a</sup> Xiaowen Qin,<sup>a</sup> Chenwei Liu,<sup>a</sup> Weiheng Yuan,<sup>a</sup> Tanyu Song<sup>a</sup> and  
Zhiping Yin<sup>\*,a</sup>

<sup>a</sup> School of Pharmacy, Jiangsu University, Zhenjiang 212013, P. R. China ;

Email: [zhiping\\_yin@ujs.edu.cn](mailto:zhiping_yin@ujs.edu.cn)

### Content

|                                                                                                             |    |
|-------------------------------------------------------------------------------------------------------------|----|
| 1. General comments .....                                                                                   | 2  |
| 2. General procedures .....                                                                                 | 2  |
| 2.1.1 General procedures for synthesizing substrates 1n .....                                               | 2  |
| 2.1.2 General procedures for the electrochemical oxidative trifluoromethylation of unactivated alkenes..... | 3  |
| 2.1.3 Solvents optimization of electrochemical aminotrifluoromethylation of unactivated alkenes.....        | 4  |
| 2.1.4 Electrodes optimization of electrochemical aminotrifluoromethylation of unactivated alkenes.....      | 4  |
| 2.1.5 Additives optimization of electrochemical aminotrifluoromethylation of unactivated alkenes.....       | 5  |
| 2.2 Failed examples .....                                                                                   | 6  |
| 2.3 Large-scale synthesis .....                                                                             | 6  |
| 2.4 Anodic oxidative coupling of sodium <i>p</i> -tolylsulfinate with HFIP.....                             | 6  |
| 2.5 Cyclic voltammetry measurements.....                                                                    | 7  |
| 2.6 Control experiments.....                                                                                | 8  |
| 3. Characterization data of products .....                                                                  | 10 |
| 3. Reference .....                                                                                          | 14 |
| 4. Copies of NMR Spectra of products.....                                                                   | 15 |

## 1. General comments

Chemicals were purchased from Adamas, Bidepharm., TCI, or Aladdin and used as such unless stated otherwise. Acetonitrile was purchased from Aladdin (AR, >99% (GC)). The instrument for electrolysis is a domestic dual display DC stabilized power supply (HY3005B). Cyclic voltammograms were obtained on a CHI660E potentiostat. NMR spectra were recorded on Bruker AV 400 spectrometer. Chemical shifts (ppm) are given relative to TMS (0.00 ppm) for  $^1\text{H}$  and  $\text{CDCl}_3$  (77.0 ppm) for  $^{13}\text{C}$  solvent. Multiplets were assigned as s (singlet), d (doublet), t (triplet), q (quartet), p (pentet), dd (doublet of doublet), m (multiplet) and br.s (broad singlet). All measurements were carried out at room temperature unless otherwise stated. High-resolution mass spectra HRMS spectra were recorded on a Thermo Scientific Exactive Orbitrap Mass Spectrometer under Electron Spray Ionization conditions preparing sample solution in methanol. The data are given as mass units per charge (m/z). GC yields were calculated using hexadecane as an internal standard. Gas chromatography analysis was performed on an Agilent 6820 instrument with an FID detector and HP-5 capillary column (polydimethylsiloxane with 5% phenyl groups, 30 m, 0.32 mm i.d. 0.25  $\mu\text{m}$  film thickness) using nitrogen as carrier gas. The products were isolated from the reaction mixture by column chromatography on silica gel., 54-74  $\mu\text{m}$ , 200-300 mesh (Yucheng Chemical CO., LTD, Shanghai). Substrates **1a-1p** were prepared according to our previous report.<sup>1</sup>

## 2. General procedures

### 2.1.1 General procedures for synthesizing substrates **1n**<sup>[4]</sup>

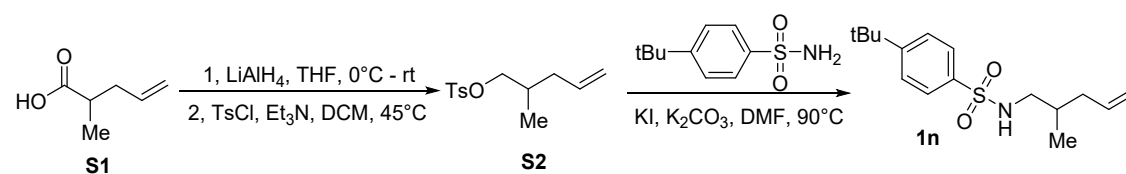

**Step 1:** To a stirred suspension of  $\text{LiAlH}_4$  (0.95 g, 25 mmol, 1.0 equiv) in anhydrous THF (50 mL) was slowly added a solution of 2-methylpent-4-enoic acid (2.85 g, 25 mmol, 1.0 equiv) in THF (10 mL). After 16 h at room temperature, the reaction mixture was cooled to  $0^\circ\text{C}$  and cautiously treated with water (1.9 mL), then with a 15% aqueous solution of  $\text{NaOH}$  (1.9 mL), and then with water (5.7 mL). After 1 h

of stirring at room temperature, the resulting suspension was filtered through Celite. The insoluble salts were washed with diethyl ether (2 x 20 mL) and the filtrate was dried over MgSO<sub>4</sub>. Filtration and concentration under reduced pressure gave 2.85 g (94%) of 2-methylpent-4-en-1-ol, which was directly engaged in the next step without further purification.

**Step 2:** To an oven-dried round bottom flask (50 mL) equipped with a stirring bar was added 2-methylpent-4-en-1-ol (5 mmol, 0.5 g, 1.00 eq.), 4-methylbenzenesulfonyl (6 mmol, 1.14g, 1.20 eq.) triethylamine (7 mmol, 0.995 mL, 1.40 eq.) in 25 mL DCM. Then the reaction mixture was stirred at 45° for 24 hours. After the reaction was completed, the reaction mixture was washed with brine, and dried over Na<sub>2</sub>SO<sub>4</sub>. The crude product was purified by column chromatography after the removal of the solvent to afford product **S2** in 0.71 g, 56% yield.

**Step 3:** To an oven-dried round bottom flask (50 mL) equipped with a stirring bar was added **S2** (2 mmol, 0.51 g, 1.00 eq.), 4-(tert-butyl)benzenesulfonamide (2 mmol, 0.85g, 2.00 eq.), potassium iodide (0.15 mmol, 25 mg, 0.15 eq.), potassium carbonate (3mmol, 0.415g, 3.00 eq.) in 20 mL DMF. Then the reaction mixture was stirred at 90° for 12 hours. After the reaction was completed, the reaction mixture was washed with brine, dried over Na<sub>2</sub>SO<sub>4</sub>. The crude product was purified by column chromatography after the removal of the solvent to afford **1n** in 442.5 mg, 75% yield.

### 2.1.2 General procedures for the electrochemical oxidative trifluoromethylation of unactivated alkenes

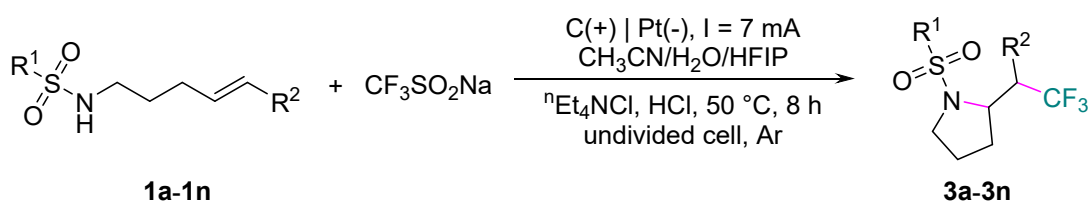

To an oven-dried tube (10 mL) equipped with a stirring bar was added **1a-1n** (0.4 mmol, 95.6 mg), CF<sub>3</sub>SO<sub>2</sub>Na (1.0 mmol, 156 mg), nEt<sub>4</sub>NCl (0.6 mmol, 99.4 mg) and CH<sub>3</sub>CN/H<sub>2</sub>O (5/1 mL). The reaction tube was equipped with platinum electrodes (1.0 cm×2.0 cm×0.1 mm) as the cathode and graphite (1.0 cm×2.0 cm×2 mm) as the anode. The tube was capped with a rubber septum, evacuated, and backfilled with argon three times. The liquid solvent HFIP (0.35 mL) and HCl (6 ul) were added through the septum. Then the reaction mixture was stirred and electrolyzed at a constant current of 7 mA under 50 °C and argon atmosphere for 8 hours. After TLC indicated complete conversion of the starting material, the reaction mixture was diluted with sat. NaCl and extracted with EtOAc (3 x 5 mL). The combined organic

phase was concentrated under reduced pressure and crude products were purified by column chromatography on silica gel (eluent: petroleum ether/ethyl acetate = 10:1) to give the pure product **3a-3n**.

### 2.1.3 Solvents optimization of electrochemical aminotrifluoromethylation of unactivated alkenes.

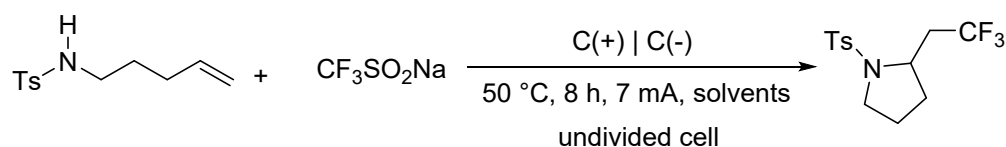

| Entry | Solvents                                            | Yield (%) |
|-------|-----------------------------------------------------|-----------|
| 1     | CH <sub>3</sub> CN/H <sub>2</sub> O                 | 31.4      |
| 2     | CH <sub>3</sub> CN                                  | 7.5       |
| 3     | MeOH                                                | 15.1      |
| 4     | DCM                                                 | 7.4       |
| 5     | THF                                                 | 10.6      |
| 6     | DMSO                                                | 12.5      |
| 7     | CH <sub>3</sub> CN/H <sub>2</sub> O (5:1)           | 50.8      |
| 8     | CH <sub>3</sub> CN/H <sub>2</sub> O (3:1)           | 39.4      |
| 9     | CH <sub>3</sub> CN/H <sub>2</sub> O (2:1)           | 31.8      |
| 10    | CH <sub>3</sub> CN/H <sub>2</sub> O (1:1)           | 17.3      |
| 11    | CH <sub>3</sub> CN/H <sub>2</sub> O/HOAc (10:1:0.2) | 43.5      |

(Reaction conditions: graphite 10 x 20 mm,  $J = 7 \text{ mA/cm}^2$ , platinum electrode surface 10 x 10 mm,  $J = 7 \text{ mA/cm}^2$ , the distance of electrodes = 7 mm, constant current electricity of 7 mA, undivided cell, **1a** 0.4 mmol, **2a** 1.0 mmol, CH<sub>3</sub>CN 5 mL, 50 °C, 8 h. GC yield of mixture **3a** was determined by using hexadecane as the internal standard.)

### 2.1.4 Electrodes optimization of electrochemical aminotrifluoromethylation of unactivated alkenes

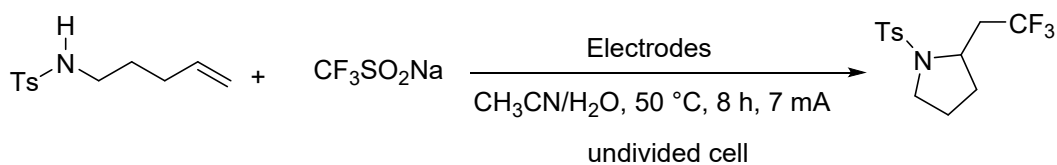

| Entry | Electrode      | Yield (%) |
|-------|----------------|-----------|
| 1     | C (+)   Pt (-) | 55        |
| 2     | C (+)   C (-)  | 50.8      |
| 3     | C (+)   Ni (-) | 13.2      |
| 4     | C (+)   SS (-) | 47.1      |
| 5     | Pt (+)   C (-) | 17.4      |

(Reaction conditions: Anode area 10 x 20 mm,  $J = 7 \text{ mA/cm}^2$ , Cathode area 10 x 10 mm,  $J = 7 \text{ mA/cm}^2$ , the distance of electrodes = 7 mm, constant current electricity of 7 mA, undivided cell, **1a** 0.4 mmol, **2a** 1.0 mmol,  $\text{CH}_3\text{CN}$  5 mL,  $\text{H}_2\text{O}$  1 mL,  $50^\circ\text{C}$ , 8 h. GC yield of mixture **3a** was determined by using hexadecane as the internal standard.)

### 2.1.5 Additives optimization of electrochemical aminotrifluoromethylation of unactivated alkenes

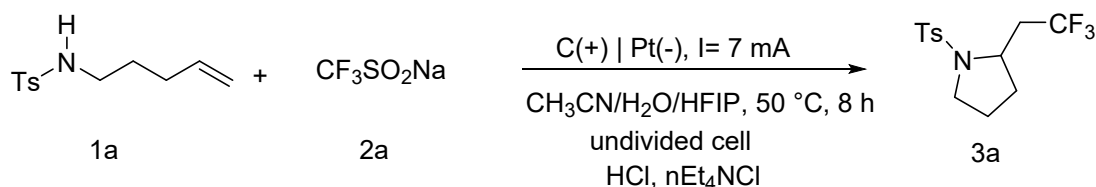

| Entry           | Other condition                     | Yield (%)              |
|-----------------|-------------------------------------|------------------------|
| 1 <sup>a</sup>  | HOAc 0.1 mL                         | 42.2                   |
| 2 <sup>a</sup>  | HOAc 0.2 mL                         | 29.0                   |
| 3 <sup>a</sup>  | HOAc/HFIP 0.1/0.2 mL                | 30.3                   |
| 4 <sup>a</sup>  | HFIP 0.2 mL                         | 59                     |
| 5 <sup>a</sup>  | HFIP 0.35 mL                        | 65                     |
| 6 <sup>a</sup>  | HFIP 0.75 mL                        | 63                     |
| 7 <sup>b</sup>  | $\text{nMe}_4\text{NCl}$ 0.3 equiv. | 43.9                   |
| 8 <sup>b</sup>  | $\text{nEt}_4\text{NCl}$ 0.3 equiv. | 48.8                   |
| 9 <sup>b</sup>  | $\text{nBuNCl}$ 0.3 equiv.          | 39.1                   |
| 10 <sup>b</sup> | $\text{nEt}_4\text{NCl}$ 0.2 equiv. | 42.9                   |
| 11 <sup>b</sup> | $\text{nEt}_4\text{NCl}$ 0.4 equiv. | 40.6                   |
| 12 <sup>b</sup> | $\text{nEt}_4\text{NCl}$ 0.5 equiv. | 48.6                   |
| 13 <sup>b</sup> | $\text{nEt}_4\text{NCl}$ 1.0 equiv. | 54.2                   |
| 14 <sup>b</sup> | $\text{nEt}_4\text{NCl}$ 1.5 equiv. | 79.6                   |
| 15 <sup>b</sup> | $\text{nEt}_4\text{NCl}$ 2 equiv.   | 70.3                   |
| 16 <sup>c</sup> | HCl                                 | 66.0                   |
| 17 <sup>c</sup> | NaOH                                | 0                      |
| 18 <sup>c</sup> | HCl 4.5 $\mu\text{L}$               | 56.9                   |
| 19 <sup>c</sup> | HCl 6 $\mu\text{L}$                 | 83.0 (79) <sup>d</sup> |
| 20 <sup>c</sup> | HCl 12 $\mu\text{L}$                | 72.5                   |

(Reaction conditions <sup>a</sup>: graphite 10 x 20 mm,  $J = 7 \text{ mA/cm}^2$ , platinum electrode surface 10 x 10 mm,  $J = 7 \text{ mA/cm}^2$ , the distance of electrodes = 10 mm, constant current electricity of 7 mA, undivided cell, **1a** 0.4 mmol, **2a** 1.0 mmol,  $\text{CH}_3\text{CN}$  5 mL,  $\text{H}_2\text{O}$  1 mL,  $50^\circ\text{C}$ , 8 h. <sup>b</sup>:  $\text{CH}_3\text{CN}/\text{H}_2\text{O}/\text{HFIP}=5/1.0/0.35 \text{ mL}$ . <sup>c</sup>:  $\text{nEt}_4\text{NCl}$  1.5 equiv. <sup>d</sup> GC yield of mixture **3a** was determined by using hexadecane as the internal standard, isolation yield in parentheses.)

## 2.2 Failed examples

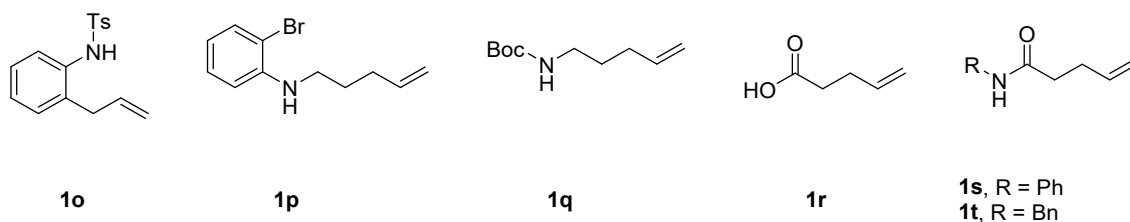

## 2.3 Large-scale synthesis

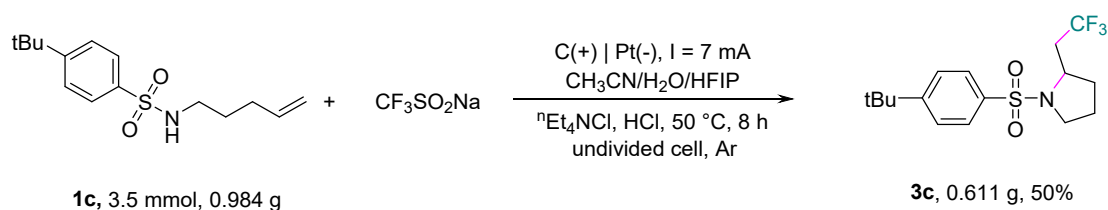

To an oven-dried three-necked flask (50 mL) equipped with a stirring bar was added **1c** (3.5 mmol, 0.984 g),  $\text{CF}_3\text{SO}_2\text{Na}$  (7.0 mmol, 1.09 mg), a  $n\text{Et}_4\text{NCl}$  (5.25 mmol, 869.9 mg) and  $\text{CH}_3\text{CN}/\text{H}_2\text{O}$  (25/5 mL). The reaction tube was equipped with platinum electrodes (1.0 cm×2.0 cm×0.1 mm) as the cathode and graphite (1.0 cm×2.0 cm×2 mm) as the anode. The flask was capped with a rubber septum, evacuated, and backfilled with argon three times. The liquid solvent HFIP (1.75 mL) and HCl (30  $\mu\text{l}$ ) were added through the septum. Then the reaction mixture was stirred and electrolyzed at a constant current of 7 mA under 50 °C and argon atmosphere for 48 hours. After TLC indicated complete conversion of the starting material, the reaction mixture was diluted with sat. NaCl and extracted with EtOAc (3 x 20 mL). The combined organic phase was concentrated under reduced pressure and crude products were purified by column chromatography on silica gel (eluent: petroleum ether/ethyl acetate = 10:1) to give the pure product **3c** in 0.611 g, 50% yield.

## 2.4 Anodic oxidative coupling of sodium *p*-tolylsulfinate with HFIP

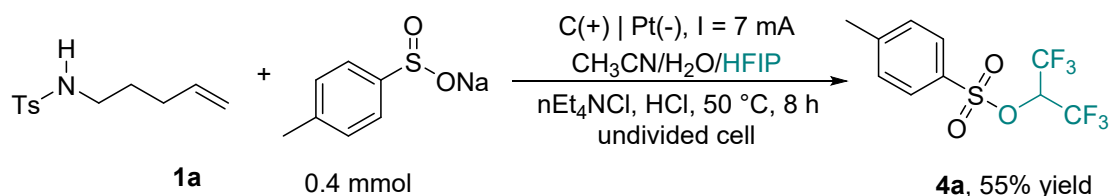

To an oven-dried tube (10 mL) equipped with a stirring bar was added **1a** (0.2 mmol, 47.8 mg), sodium *p*-tolylsulfinate (0.4 mmol, 71.2 mg),  $n\text{Et}_4\text{NCl}$  (0.6 mmol, 99.4 mg) and  $\text{CH}_3\text{CN}/\text{H}_2\text{O}$  (5/1 mL). The

reaction tube was equipped with platinum electrodes (1.0 cm×2.0 cm×0.1 mm) as the cathode and graphite (1.0 cm×2.0 cm×2 mm) as the anode. The tube was capped with a rubber septum, evacuated, and backfilled with argon three times. The liquid solvent HFIP (0.35 mL) and HCl (6 ul) were added through the septum. Then the reaction mixture was stirred and electrolyzed at a constant current of 7 mA under 50 °C and argon atmosphere for 8 hours. After TLC indicated complete conversion of the starting material, the reaction mixture was diluted with sat. NaCl and extracted with EtOAc (3 x 5 mL). The combined organic phase was concentrated under reduced pressure and crude products were purified by column chromatography on silica gel (eluent: petroleum ether/ethyl acetate = 20:1) to give the pure product **4a** in 70.8 mg, 55% yield.

## 2.5 Cyclic voltammetry measurements

Cyclic voltammetry was obtained using a platinum working electrode (1 x 1 cm), and a graphite counter electrode (1 x 1 cm). The reference was an Ag/AgCl electrode submerged in saturated KCl solution and separated from the reaction by a salt bridge at room temperature. The scan rate was 0.10 V/s, ranging from 0.0 V to 1.5 V. **a)** MeOH (10 mL) + nBu<sub>4</sub>NBF<sub>4</sub> (0.01 M); **b)** MeOH (10 mL) + nBu<sub>4</sub>NBF<sub>4</sub> (0.01 M) + 0.4 mmol **1c**; **c)** MeOH (10 mL) + nBu<sub>4</sub>NBF<sub>4</sub> (0.01 M) + 8 mmol CF<sub>3</sub>SO<sub>2</sub>Na; **d)** MeOH (10 mL) + nBu<sub>4</sub>NBF<sub>4</sub> (0.01 M) + 0.4 mmol **1c** + 8 mmol CF<sub>3</sub>SO<sub>2</sub>Na; **e)** MeOH (10 mL) + nBu<sub>4</sub>NBF<sub>4</sub> (0.01 M) + 2 mmol CF<sub>3</sub>SO<sub>2</sub>Na; **f)** MeOH (10 mL) + nBu<sub>4</sub>NBF<sub>4</sub> (0.01 M) + 4 mmol CF<sub>3</sub>SO<sub>2</sub>Na.

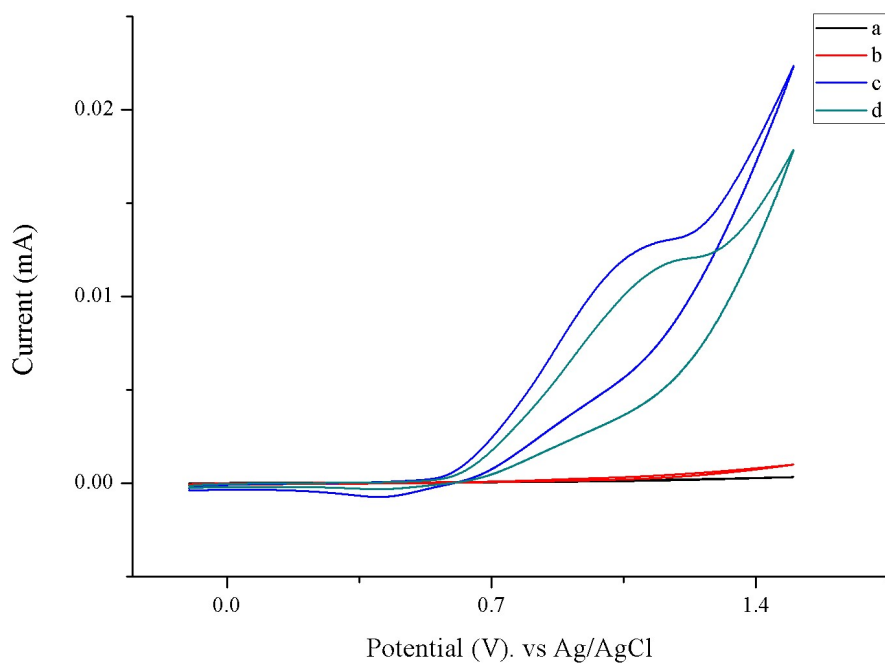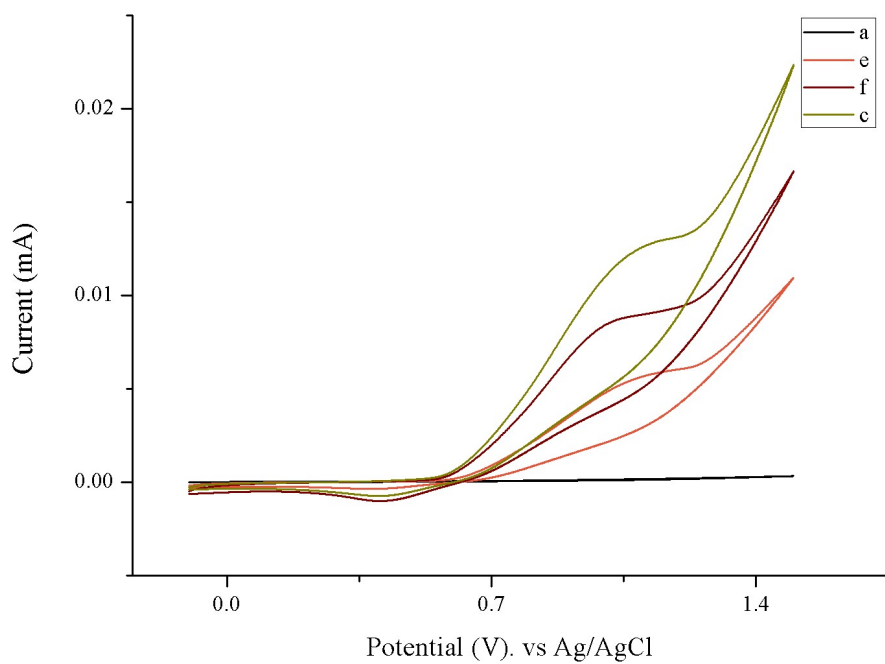

## 2.6 Control experiments

To an oven-dried tube (10 mL) equipped with a stirring bar was added **1a** (0.4 mmol, 95.6 mg), radical scavengers (TEMPO or THP or 1,1-Diphenylethylene, 2.5 eq.),  $\text{CF}_3\text{SO}_2\text{Na}$  (1.0 mmol, 156 mg),  $\text{nEt}_4\text{NCl}$  (0.6 mmol, 99.4 mg) and  $\text{CH}_3\text{CN}/\text{H}_2\text{O}$  (5/1 mL). The reaction tube was equipped with platinum



electrodes (1.0 cm×2.0 cm×0.1 mm) as the cathode and graphite (1.0 cm×2.0 cm×2 mm) as the anode. The tube was capped with a rubber septum, evacuated, and backfilled with argon three times. The liquid solvent HFIP (0.35 mL) and HCl (6 ul) were added through the septum. The reaction mixture was stirred and electrolyzed at a constant current of 7 mA under 50 °C and argon atmosphere for 8 hours, and then those reaction mixtures were detected by GC-MS.

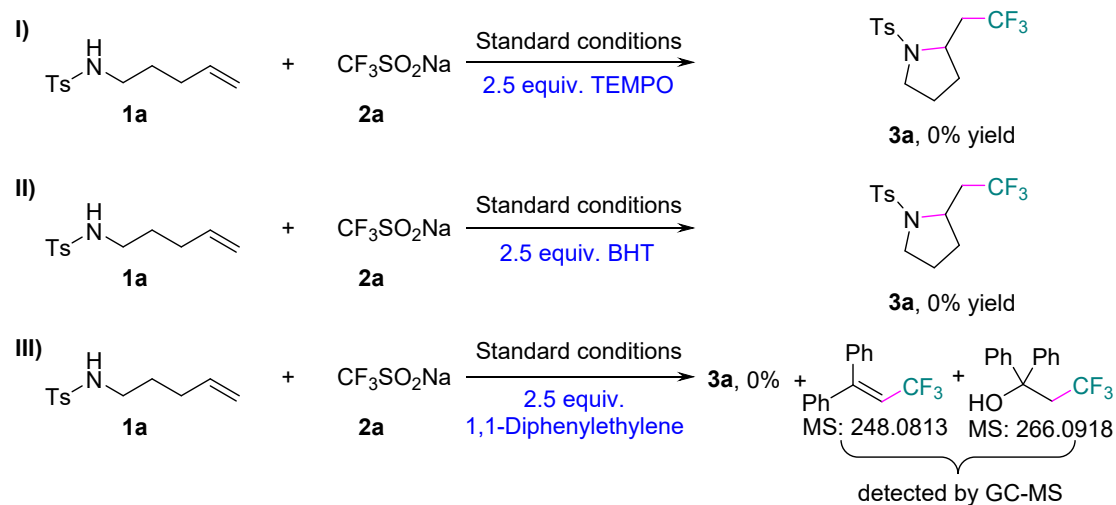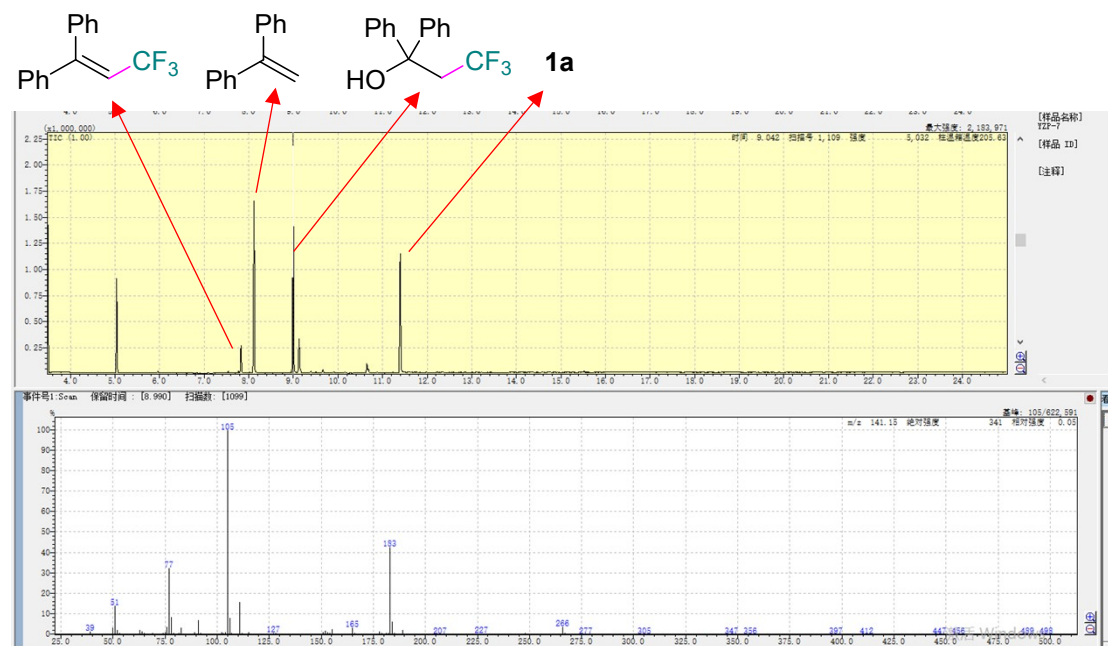

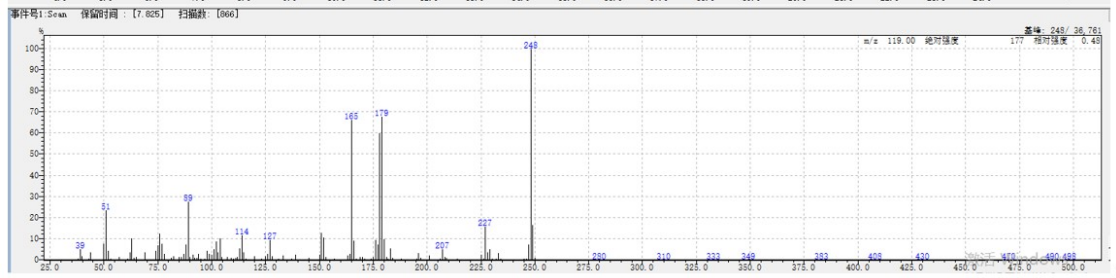

### 3. Characterization data of products

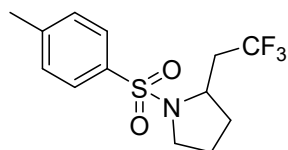

**Tosyl-2-(2,2,2-trifluoroethyl)pyrrolidine (3a):** (97 mg, white solid, yield: 79%)

$^1\text{H NMR}$  (400 MHz,  $\text{CDCl}_3$ )  $\delta$  7.72 (d,  $J = 8.3$  Hz, 2H), 7.34 (d,  $J = 7.7$  Hz, 2H), 3.79 – 3.63 (m, 1H), 3.51 – 3.38 (m, 1H), 3.16 (dt,  $J = 10.2, 6.9$  Hz, 1H), 3.01 (dq,  $J = 14.6, 11.7, 2.8$  Hz, 1H), 2.44 (s, 3H), 2.36 – 2.17 (m, 1H), 1.89 – 1.68 (m, 3H), 1.56 – 1.45 (m, 1H).

$^{13}\text{C NMR}$  (101 MHz,  $\text{CDCl}_3$ )  $\delta$  143.86, 133.56, 129.84, 127.56, 125.69 (q,  $J_{\text{C-F}} = 278.76$  Hz), 54.58 (d,  $J_{\text{C-F}} = 3.03$  Hz), 48.97, 40.45 (q,  $J_{\text{C-F}} = 26.26$  Hz), 31.56, 23.87, 21.50.

$^{19}\text{F NMR}$  (376 MHz,  $\text{CDCl}_3$ )  $\delta$  -63.77.

The analytical data are consistent with those reported in the literature.<sup>2</sup>

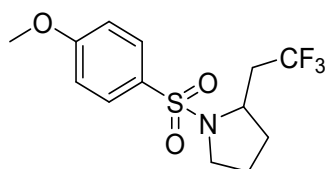

**1-(4-Methoxyphenyl)sulfonyl-2-(2,2,2-trifluoroethyl)pyrrolidine (3b):** (77 mg, white solid, yield: 57%).

$^1\text{H NMR}$  (400 MHz,  $\text{CDCl}_3$ )  $\delta$  7.77 (d,  $J = 8.9$  Hz, 2H), 7.01 (d,  $J = 8.9$  Hz, 2H), 3.88 (s, 3H), 3.71 (ddd,  $J = 8.3, 6.1, 3.3$  Hz, 1H), 3.42 (ddd,  $J = 9.8, 6.1, 5.0$  Hz, 1H), 3.15 (dt,  $J = 10.8, 6.3$  Hz, 1H), 3.00 (ddd,  $J = 14.7, 11.7, 2.9$  Hz, 1H), 2.25 (dt,  $J = 14.8, 10.5$  Hz, 1H), 1.84 – 1.72 (m, 3H), 1.59 – 1.42 (m, 1H).

$^{13}\text{C NMR}$  (101 MHz,  $\text{CDCl}_3$ )  $\delta$  163.14, 129.63, 128.21, 125.70 (q,  $J_{\text{C-F}} = 278.76$  Hz), 114.35, 55.58, 54.55 (d,  $J_{\text{C-F}} = 3.03$  Hz), 48.97, 40.45 (q,  $J_{\text{C-F}} = 26.26$  Hz), 31.58, 23.89.

$^{19}\text{F NMR}$  (376 MHz,  $\text{CDCl}_3$ )  $\delta$  -63.78.

HRMS (ESI-TOF) Calc. for  $\text{C}_{13}\text{H}_{16}\text{F}_3\text{NNaO}_3\text{S}^+$   $[\text{M}+\text{Na}]^+$ : 346.0695; found: 346.0698.

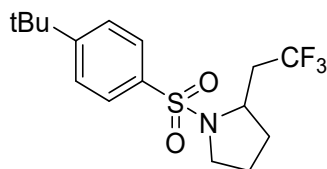

**1-(4-(tert-Butyl)phenyl)sulfonyl-2-(2,2,2-trifluoroethyl)pyrrolidine (3c):** (117.2 mg, white solid, yield: 80%).

$^1\text{H NMR}$  (400 MHz,  $\text{CDCl}_3$ )  $\delta$  7.76 (d,  $J = 8.6$  Hz, 2H), 7.55 (d,  $J = 8.6$  Hz, 2H), 3.85 – 3.68 (m, 1H), 3.44 (ddd,  $J = 9.7, 6.1, 4.9$  Hz, 1H), 3.18 (dt,  $J = 10.7, 6.5$  Hz, 1H), 3.02 (ddd,  $J = 14.7, 11.7, 2.9$  Hz, 1H), 2.26 (dt,  $J = 14.9, 10.5$  Hz, 1H), 1.80 (dd,  $J = 4.6, 1.8$  Hz, 3H), 1.55 – 1.45 (m, 1H), 1.35 (s, 9H).

$^{13}\text{C NMR}$  (101 MHz,  $\text{CDCl}_3$ )  $\delta$  156.77, 133.54, 127.45, 126.19, 125.71 (q,  $J_{\text{C-F}} = 277.75$  Hz), 54.54 (d,  $J_{\text{C-F}} = 4.04$  Hz), 48.96, 40.47 (q,  $J_{\text{C-F}} = 26.26$  Hz), 35.16, 31.58, 31.04, 23.90.

$^{19}\text{F}$  NMR (376 MHz,  $\text{CDCl}_3$ )  $\delta$  -63.74.

HRMS (ESI-TOF) Calc. for  $\text{C}_{16}\text{H}_{23}\text{F}_3\text{NO}_2\text{S}^+$   $[\text{M}+\text{H}]^+$ : 350.1396; found: 350.1400.

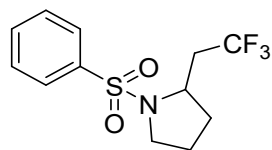

**1-(Phenylsulfonyl)-2-(2,2,2-trifluoroethyl)pyrrolidine (3d)**: (78 mg, white solid, yield: 67%).

$^1\text{H}$  NMR (400 MHz,  $\text{CDCl}_3$ )  $\delta$  7.88 – 7.80 (m, 2H), 7.63 (t,  $J = 7.4$  Hz, 1H), 7.56 (t,  $J = 7.4$  Hz, 2H), 3.75 (dtd,  $J = 11.4, 5.7, 2.7$  Hz, 1H), 3.45 (ddd,  $J = 10.4, 6.4, 5.4$  Hz, 1H), 3.18 (dt,  $J = 10.4, 6.9$  Hz, 1H), 3.06 – 2.89 (m, 1H), 2.26 (dq,  $J = 14.8, 10.5$  Hz, 1H), 1.86 – 1.71 (m, 3H), 1.58 – 1.43 (m, 1H).

$^{13}\text{C}$  NMR (101 MHz,  $\text{CDCl}_3$ )  $\delta$  136.54, 133.01, 129.24, 127.51 (q,  $J_{\text{C-F}} = 277.75$  Hz), 127.50, 54.64 (d,  $J_{\text{C-F}} = 3.03$  Hz), 48.96, 40.42 (q,  $J_{\text{C-F}} = 26.26$  Hz), 31.55, 23.86.

$^{19}\text{F}$  NMR (376 MHz,  $\text{CDCl}_3$ )  $\delta$  -63.77.

HRMS (ESI-TOF) Calc. for  $\text{C}_{12}\text{H}_{14}\text{F}_3\text{NNaO}_2\text{S}^+$   $[\text{M}+\text{Na}]^+$ : 316.0590; found: 316.0595.

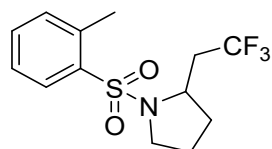

**1-(3-methylphenylsulfonyl)-2-(2,2,2-trifluoroethyl)pyrrolidine (3e)**: (74 mg, white solid, yield: 60%).

$^1\text{H}$  NMR (400 MHz,  $\text{CDCl}_3$ )  $\delta$  7.92 (dd,  $J = 8.2, 1.4$  Hz, 1H), 7.47 (td,  $J = 7.5, 1.4$  Hz, 1H), 7.33 (ddd,  $J = 8.0, 5.9, 1.7$  Hz, 2H), 4.05 (dtd,  $J = 10.8, 6.8, 3.2$  Hz, 1H), 3.39 – 3.21 (m, 2H), 2.86 – 2.70 (m, 1H), 2.66 (s, 3H), 2.18 (dt,  $J = 14.7, 10.4$  Hz, 1H), 2.04 (dq,  $J = 7.9, 3.2$  Hz, 1H), 1.96 – 1.74 (m, 3H), 1.47 – 1.14 (m, 1H).

$^{13}\text{C}$  NMR (101 MHz,  $\text{CDCl}_3$ )  $\delta$  137.98, 136.54, 133.06, 132.89, 129.73, 126.34, 125.53 (q,  $J_{\text{C-F}} = 278.76$  Hz), 53.93 (d,  $J_{\text{C-F}} = 3.03$  Hz), 48.34, 39.54 (q,  $J_{\text{C-F}} = 26.26$  Hz), 31.64, 24.13, 20.71.

$^{19}\text{F}$  NMR (376 MHz,  $\text{CDCl}_3$ )  $\delta$  -63.67.

HRMS (ESI-TOF) Calc. for  $\text{C}_{13}\text{H}_{16}\text{F}_3\text{NNaO}_2\text{S}^+$   $[\text{M}+\text{Na}]^+$ : 330.0746; found: 330.0749.

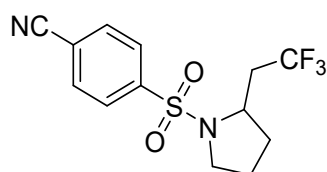

**4-((2-(2,2,2-Trifluoroethyl)pyrrolidin-1-yl)sulfonyl)benzonitrile (3f)**: (62 mg, white solid, yield: 49%).

$^1\text{H}$  NMR (400 MHz,  $\text{CDCl}_3$ )  $\delta$  7.96 (d,  $J = 8.4$  Hz, 2H), 7.86 (d,  $J = 8.4$  Hz, 2H), 3.74 (dtd,  $J = 11.0, 7.3, 3.7$  Hz, 1H), 3.49 (dt,  $J = 10.3, 5.8$  Hz, 1H), 3.14 (dt,  $J = 10.3, 6.9$  Hz, 1H), 2.95 (ddd,  $J = 14.6, 11.5, 2.9$  Hz, 1H), 2.29 (dt,  $J = 14.8, 10.4$  Hz, 1H), 1.91 – 1.74 (m, 3H), 1.59 (ddd,  $J = 11.9, 6.1, 3.5$  Hz, 1H).

$^{13}\text{C}$  NMR (101 MHz,  $\text{CDCl}_3$ )  $\delta$  140.83, 133.07, 128.04, 125.43 (q,  $J_{\text{C-F}} = 278.76$  Hz), 117.13, 116.75, 54.87 (d,  $J_{\text{C-F}} = 4.04$  Hz), 48.99, 40.23 (q,  $J_{\text{C-F}} = 27.27$  Hz), 31.50, 23.83.

$^{19}\text{F}$  NMR (376 MHz,  $\text{CDCl}_3$ )  $\delta$  -63.75.

HRMS (ESI-TOF) Calc. for  $C_{13}H_{13}F_3N_2NaO_2S^+$   $[M+Na]^+$ : 341.0542; found: 341.0551.

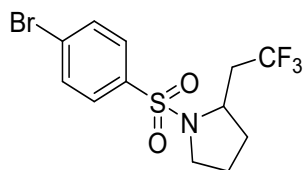

**1-((4-Bromophenyl)sulfonyl)-2-(2,2,2-trifluoroethyl)pyrrolidine (3g):** (105 mg, white solid, yield: 71%).

$^1H$  NMR (400 MHz,  $CDCl_3$ )  $\delta$  7.70 (s, 4H), 3.79 – 3.60 (m, 1H), 3.45 (ddd,  $J = 10.3, 6.5, 5.4$  Hz, 1H), 3.13 (dt,  $J = 10.3, 7.0$  Hz, 1H), 2.96 (dtd,  $J = 14.5, 11.6, 2.9$  Hz, 1H), 2.27 (dp,  $J = 14.8, 10.4$  Hz, 1H), 1.89 – 1.71 (m, 3H), 1.59 – 1.47 (m, 1H).

$^{13}C$  NMR (101 MHz,  $CDCl_3$ )  $\delta$  135.49, 132.55, 128.97, 128.12, 125.55 (q,  $J_{C-F} = 278.76$  Hz), 54.71 (d,  $J_{C-F} = 3.03$  Hz), 49.01, 40.35 (q,  $J_{C-F} = 27.27$  Hz), 31.53, 23.86.

$^{19}F$  NMR (376 MHz,  $CDCl_3$ )  $\delta$  -63.76.

HRMS (ESI-TOF) Calc. for  $C_{12}H_{13}Br^{79}F_3NNaO_2S^+$   $[M+Na]^+$ : 393.9695; found: 393.9702. Calc. for  $C_{12}H_{13}Br^{81}F_3N NaO_2S^+$   $[M+Na]^+$ : 393.9674; found: 393.9681.

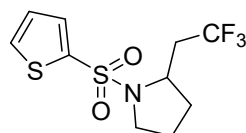

**1-(Thiophen-2-ylsulfonyl)-2-(2,2,2-trifluoroethyl)pyrrolidine (3h):** (64 mg, white solid, yield: 53%).

$^1H$  NMR (400 MHz,  $CDCl_3$ )  $\delta$  7.56 (dd,  $J = 3.7, 1.1$  Hz, 1H), 7.49 (dd,  $J = 3.9, 1.1$  Hz, 1H), 3.79 (td,  $J = 5.0, 4.4, 2.6$  Hz, 1H), 3.53 (ddd,  $J = 9.9, 6.2, 4.9$  Hz, 1H), 3.25 (dt,  $J = 10.9, 6.6$  Hz, 1H), 2.97 (dq,  $J = 14.4, 11.5, 2.9$  Hz, 1H), 2.32 (dt,  $J = 14.8, 10.4$  Hz, 1H), 2.03 – 1.79 (m, 3H), 1.64 (m, 1H), 1.27 – 1.24 (m, 1H).

$^{13}C$  NMR (101 MHz,  $CDCl_3$ )  $\delta$  136.34, 132.62, 132.16, 127.62, 125.60 (q,  $J_{C-F} = 278.76$  Hz), 55.06 (q,  $J_{C-F} = 4.04$  Hz), 49.20, 40.23 (q,  $J_{C-F} = 26.26$  Hz), 31.53, 23.97.

$^{19}F$  NMR (376 MHz,  $CDCl_3$ )  $\delta$  -63.71.

HRMS (ESI-TOF) Calc. for  $C_{10}H_{13}F_3NO_2S_2^+$   $[M+H]^+$ : 300.0334; found: 300.0341.

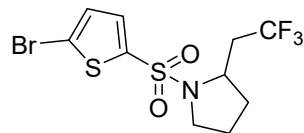

**1-((5-Bromothiophen-2-yl)sulfonyl)-2-(2,2,2-trifluoroethyl)pyrrolidine (3i):**

(70mg, white solid, yield: 47%).

$^1H$  NMR (400 MHz,  $CDCl_3$ )  $\delta$  7.37 (d,  $J = 3.9$  Hz, 1H), 7.14 (d,  $J = 3.9$  Hz, 1H), 3.84 – 3.68 (m, 1H), 3.49 (ddd,  $J = 9.9, 6.3, 5.1$  Hz, 1H), 3.28 – 3.10 (m, 1H), 2.95 (dq,  $J = 14.5, 11.6, 2.9$  Hz, 1H), 2.29 (dp,  $J = 14.8, 10.4$  Hz, 1H), 1.97 – 1.74 (m, 3H), 1.63 (td,  $J = 6.6, 5.6, 1.7$  Hz, 1H).

$^{13}C$  NMR (101 MHz,  $CDCl_3$ )  $\delta$  137.27, 132.70, 130.67, 125.53 (q,  $J_{C-F} = 278.76$  Hz), 120.12, 55.16 (d,  $J_{C-F} = 4.04$  Hz), 49.23, 40.29 (q,  $J_{C-F} = 27.27$  Hz), 31.54, 23.98.

$^{19}F$  NMR (376 MHz,  $CDCl_3$ )  $\delta$  -63.71.

HRMS (ESI-TOF) Calc. for  $C_{10}H_{11}Br^{79}F_3NNaO_2S_2^+$   $[M+Na]^+$ : 399.9259; found: 399.9259. Calc. for  $C_{10}H_{11}Br^{81}F_3NNaO_2S_2^+$   $[M+Na]^+$ : 399.9238; found: 399.9238

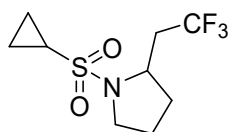

**1-(Cyclopropylsulfonyl)-2-(2,2,2-trifluoroethyl)pyrrolidine (3j)**: (55 mg, white solid, yield: 54%).

$^1H$  NMR (400 MHz,  $CDCl_3$ )  $\delta$  4.12 – 3.99 (m, 1H), 3.51 – 3.31 (m, 2H), 2.86 (ddd,  $J = 14.8, 11.7, 3.1$  Hz, 1H), 2.43 – 2.29 (m, 1H), 2.26 – 2.09 (m, 2H), 2.00 – 1.83 (m, 3H), 1.24 – 1.18 (m, 2H), 1.03 – 0.98 (m, 2H).

$^{13}C$  NMR (101 MHz,  $CDCl_3$ )  $\delta$  125.59 (q,  $J_{C-F} = 278.76$  Hz), 54.42 (d,  $J_{C-F} = 3.03$  Hz), 48.73, 40.16 (q,  $J_{C-F} = 27.27$  Hz), 31.76, 26.40, 24.52, 4.72, 4.42.

$^{19}F$  NMR (376 MHz,  $CDCl_3$ )  $\delta$  -63.70.

HRMS (ESI-TOF) Calc. for  $C_9H_{15}F_3NO_2S^+$   $[M+H]^+$ : 258.0770; found: 258.0769.

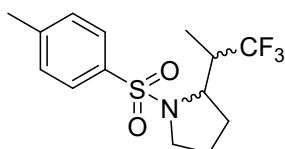

**1-Tosyl-2-(1,1,1-trifluoropropan-2-yl)pyrrolidine (3l-m)**: (63 mg, white solid, yield: 49%)

$^1H$  NMR (400 MHz,  $CDCl_3$ )  $\delta$  7.71 (dd,  $J = 8.4, 2.5$  Hz, 2H), 7.33 (t,  $J = 8.2$  Hz, 2H), 3.87 – 3.71 (m, 1H), 3.32 (dt,  $J = 5.1, 1.9$  Hz, 2H), 3.25 (dt,  $J = 10.4, 7.3$  Hz, 1H), 2.70 – 2.55 (m, 1H), 2.43 (d,  $J = 3.3$  Hz, 3H), 1.95 – 1.37 (m, 4H), 1.25 (d,  $J = 7.3$  Hz, 2H), 1.16 (d,  $J = 7.1$  Hz, 2H).

$^{13}C$  NMR (101 MHz,  $CDCl_3$ )  $\delta$  143.86, 143.70, 134.61, 133.43, 129.84, 129.77, 129.04, 128.81, 127.65, 127.55, 126.25, 126.02, 60.46, 60.44, 58.02, 57.99, 49.96, 48.45, 42.16, 41.92, 41.70, 41.46, 28.55, 26.54, 24.67, 23.83, 21.50, 12.05, 6.61.

$^{19}F$  NMR (376 MHz,  $CDCl_3$ )  $\delta$  -67.78, -70.24.

HRMS (ESI-TOF) Calc. for  $C_{14}H_{18}F_3NNaO_2S^+$   $[M+Na]^+$ : 344.0903; found: 344.0907.

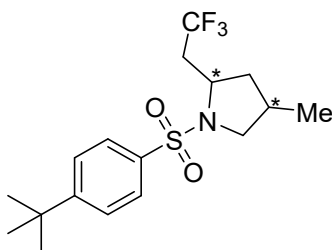

**1-((4-(tert-butyl)phenyl)sulfonyl)-4-methyl-2-(2,2,2-trifluoroethyl)pyrrolidine (3n)**: (84 mg, white solid, yield: 77%)

$^1H$  NMR (400 MHz,  $CDCl_3$ )  $\delta$  7.75 (d,  $J = 8.6$  Hz, 2H), 7.55 (d,  $J = 8.5$  Hz, 2H), 3.74 – 3.44 (m, 2H), 3.41 – 3.14 (m, 1H), 2.91 (t,  $J = 10.9$  Hz, 1H), 2.41 – 2.15 (m, 2H), 1.63 – 1.38 (m, 2H), 1.35 (s, 9H), 0.93 (d,  $J = 6.2$  Hz, 3H).

$^{13}C$  NMR (101 MHz,  $CDCl_3$ )  $\delta$  156.81, 133.87, 127.47, 126.29, 125.92 (q,  $J_{C-F} = 278.80$  Hz), 55.82, 55.57 (d,  $J_{C-F} = 3.03$  Hz), 41.31, 41.07 (q,  $J_{C-F} = 27.27$  Hz), 35.21, 32.71, 31.09, 16.40.

$^{19}F$  NMR (376 MHz,  $CDCl_3$ )  $\delta$  -63.75, -63.78.

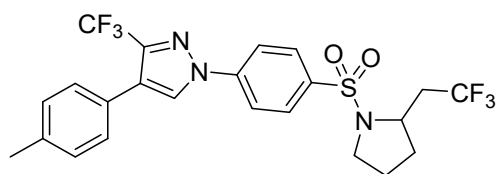

**4-(p-Tolyl)-1-(4-((2-(2,2,2-trifluoroethyl)pyrrolidin-1-yl)sulfonyl)phenyl)-3-(trifluoromethyl)-1H-pyrazole (30):** (88 mg, white solid, yield: 43%).

$^1\text{H}$  NMR (400 MHz, Chloroform-*d*)  $\delta$  7.83 (d,  $J = 8.7$  Hz, 2H), 7.51 (d,  $J = 8.7$  Hz, 2H), 7.17 (d,  $J = 7.9$  Hz, 2H), 7.09 (d,  $J = 8.2$  Hz, 2H), 6.75 (s, 1H), 3.70 (dtd,  $J = 11.2, 5.7, 5.0, 2.7$  Hz, 1H), 3.53 – 3.40 (m, 1H), 3.13 (dt,  $J = 10.4, 6.9$  Hz, 1H), 2.96 (ddd,  $J = 14.6, 11.6, 2.9$  Hz, 1H), 2.38 (s, 3H), 2.27 (dt,  $J = 14.8, 10.4$  Hz, 1H), 1.91 – 1.72 (m, 3H), 1.61 – 1.47 (m, 1H).

$^{13}\text{C}$  NMR (101 MHz,  $\text{CDCl}_3$ )  $\delta$  145.32, 144.18 (d,  $J_{\text{C-F}} = 38.38$  Hz), 142.80, 139.88, 136.08, 129.72, 128.68, 128.49, 125.70, 125.56, 123.25 (q,  $J_{\text{C-F}} = 269.67$  Hz), 106.27, 54.78 (d,  $J_{\text{C-F}} = 3.03$  Hz), 49.02, 40.34 (q,  $J_{\text{C-F}} = 27.27$  Hz), 31.54, 23.83, 21.25.

$^{19}\text{F}$  NMR (376 MHz,  $\text{CDCl}_3$ )  $\delta$  -62.46, -63.82.

HRMS (ESI-TOF) Calc. for  $\text{C}_{23}\text{H}_{21}\text{F}_6\text{NNa}_3\text{O}_2\text{S}^+$   $[\text{M}+\text{Na}]^+$ : 540.1151; found: 540.1152.

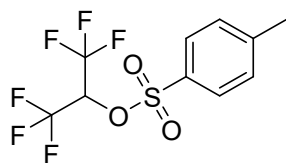

**1,1,1,3,3,3-Hexafluoropropan-2-yl 4-methylbenzenesulfonate (4a):** (70.8 mg, colorless oil, yield: 55%).

$^1\text{H}$  NMR (400 MHz, Chloroform-*d*)  $\delta$  7.82 (d,  $J = 8.4$  Hz, 2H), 7.39 (d,  $J = 8.1$  Hz, 2H), 5.27 (hept,  $J = 5.6$  Hz, 1H), 2.48 (s, 3H).

$^{13}\text{C}$  NMR (101 MHz,  $\text{CDCl}_3$ )  $\delta$  146.64, 131.83, 128.15, 119.86 (q,  $J_{\text{C-F}} = 282$  Hz), 71.82 (p,  $J_{\text{C-F}} = 35$  Hz), 21.75

$^{19}\text{F}$  NMR (376 MHz,  $\text{CDCl}_3$ )  $\delta$  -73.14.

The analytical data are consistent with those reported in the literature.<sup>3</sup>

### 3. Reference

1. Y. He, X. Qin, X. He, X.-F. Wu and Z. Yin, *Eur. J. Org. Chem.*, **2021**, 5831-5834.
2. J.-S. Lin, Y.-P. Xiong, C.-L. Ma, L.-J. Zhao, B. Tan and X.-Y. Liu, *Chem. Eur. J.*, 2014, **20**, 1332-1340.
3. E. Deruer, V. Hamel, S. Blais and S. Canesi, *Beilstein J. Org. Chem.*, 2018, **14**, 1203-1207.
4. (a) A. Archambeau, T. Rovis, *Angew. Chem. Int. Ed.* **2015**, *54*, 13337-13340; (b) C. Taillier, B. Gille, V. Bellosta, J. Cossy, *J. Org. Chem.* **2005**, *70*, 2097-2108.

## 4. Copies of NMR Spectra of products

### Figure S1 <sup>1</sup>H NMR spectrum for compound 3a

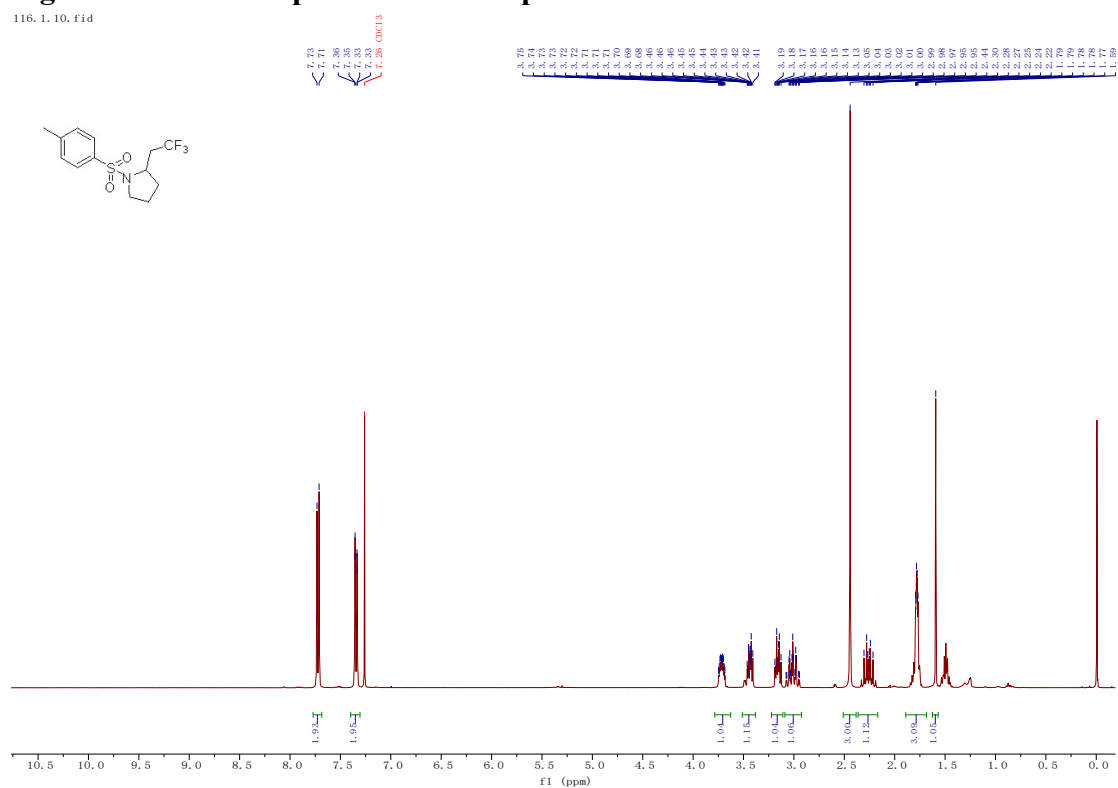

### Figure S2 <sup>13</sup>C NMR spectrum for compound 3a

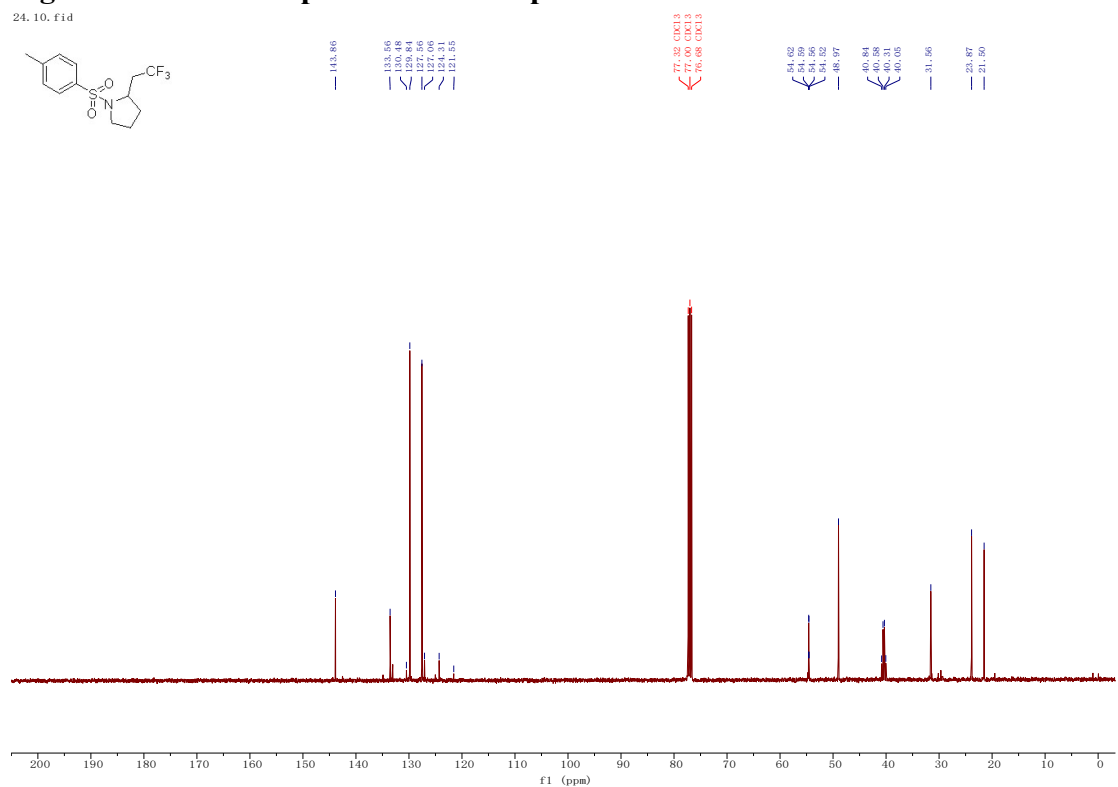





Figure S5 <sup>13</sup>C NMR spectrum for compound 3b

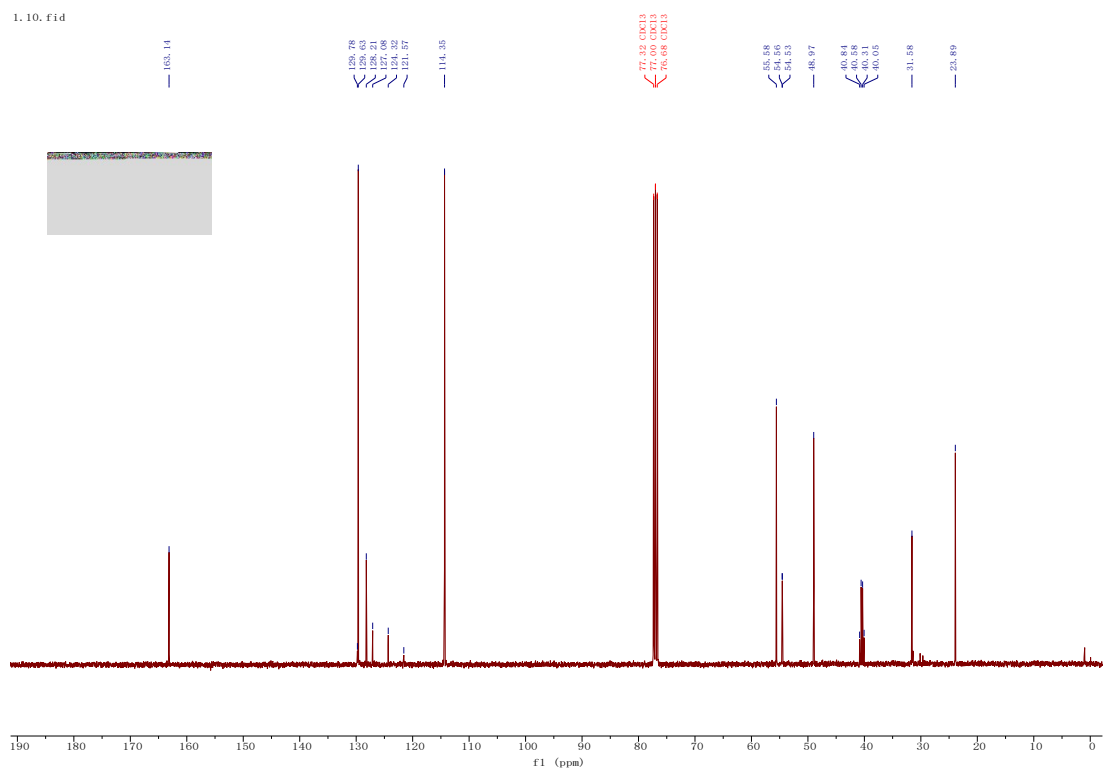

Figure S6 <sup>19</sup>F NMR spectrum for compound 3b

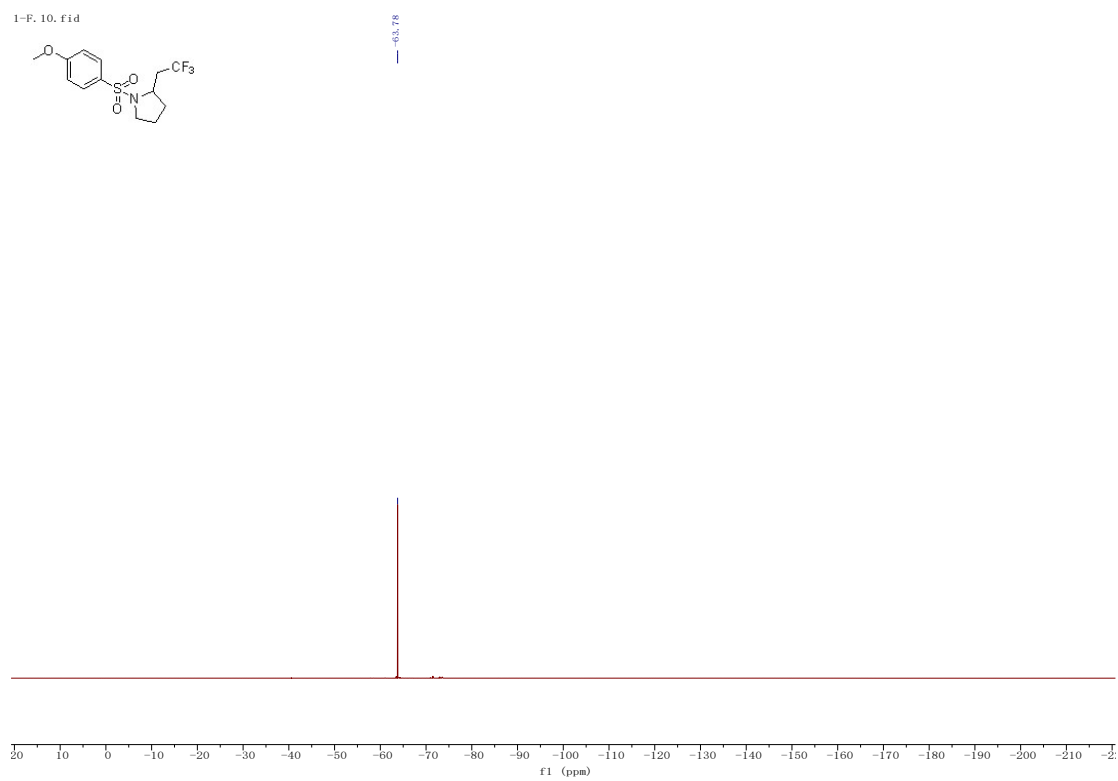

**Figure S7 <sup>1</sup>H NMR spectrum for compound 3c**

2023-4-25, 116, f1d  
20230425-1-H

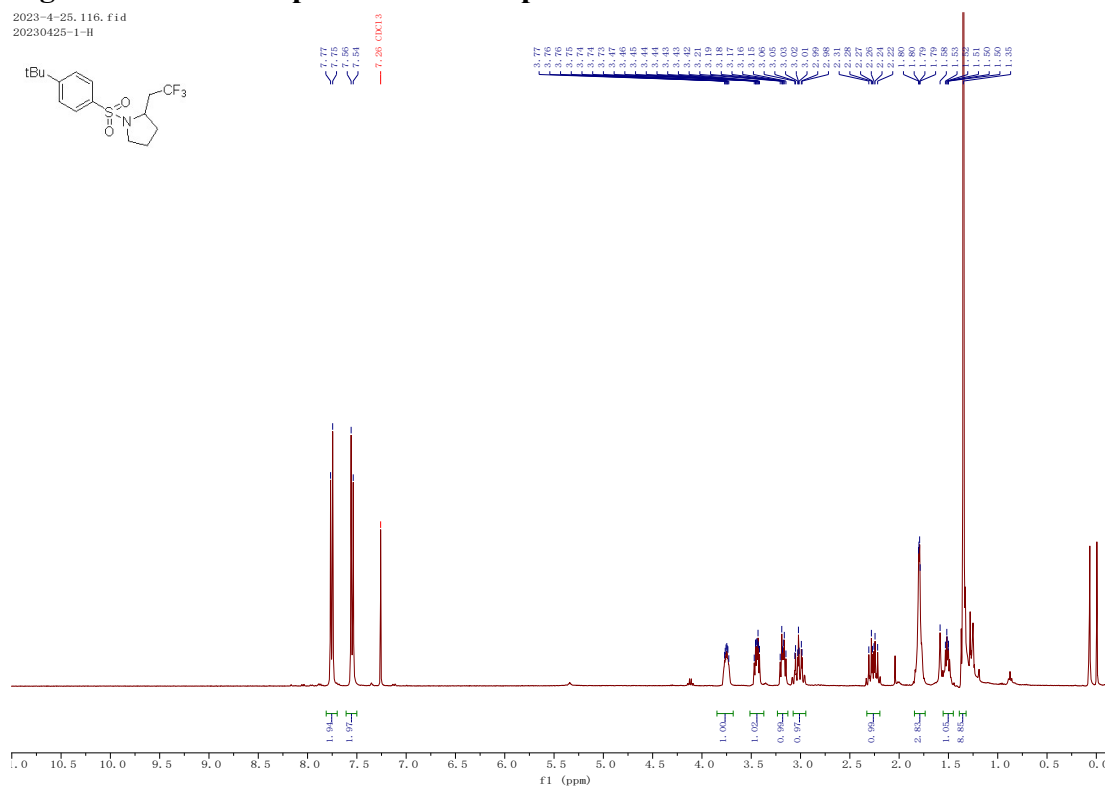

**Figure S8 <sup>13</sup>C NMR spectrum for compound 3c**

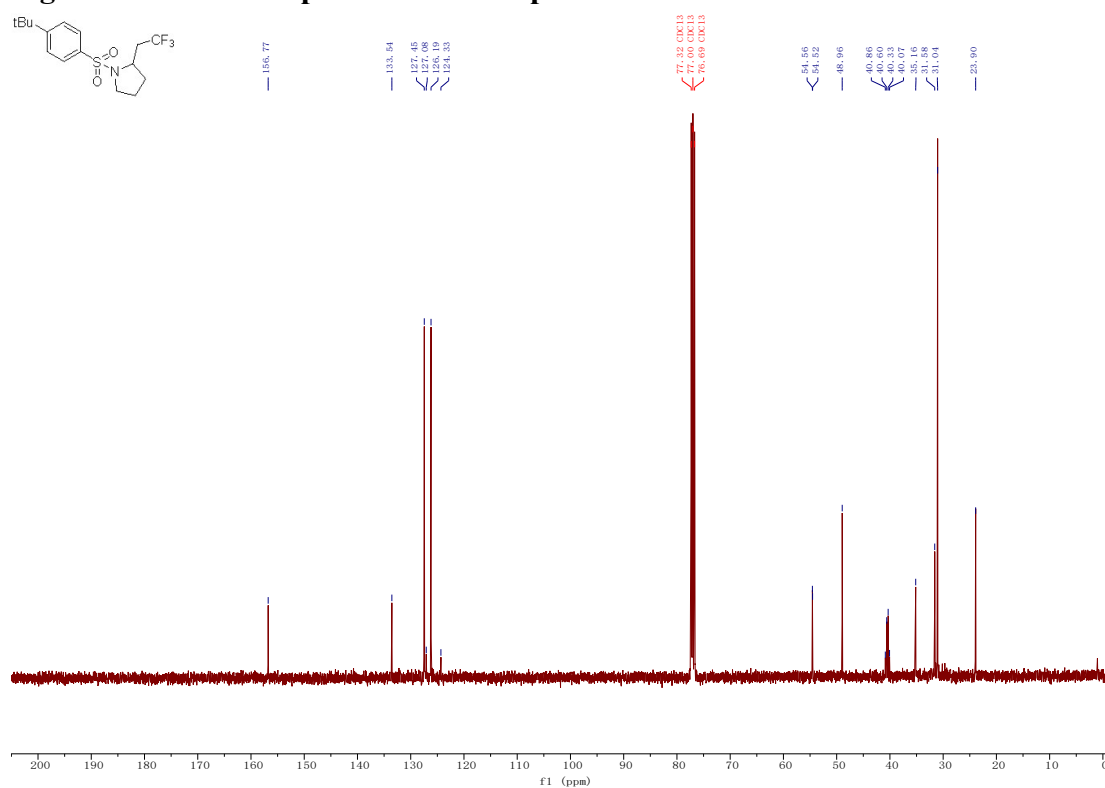

### Figure S9 <sup>19</sup>F NMR spectrum for compound 3c

23-F\_10.fid

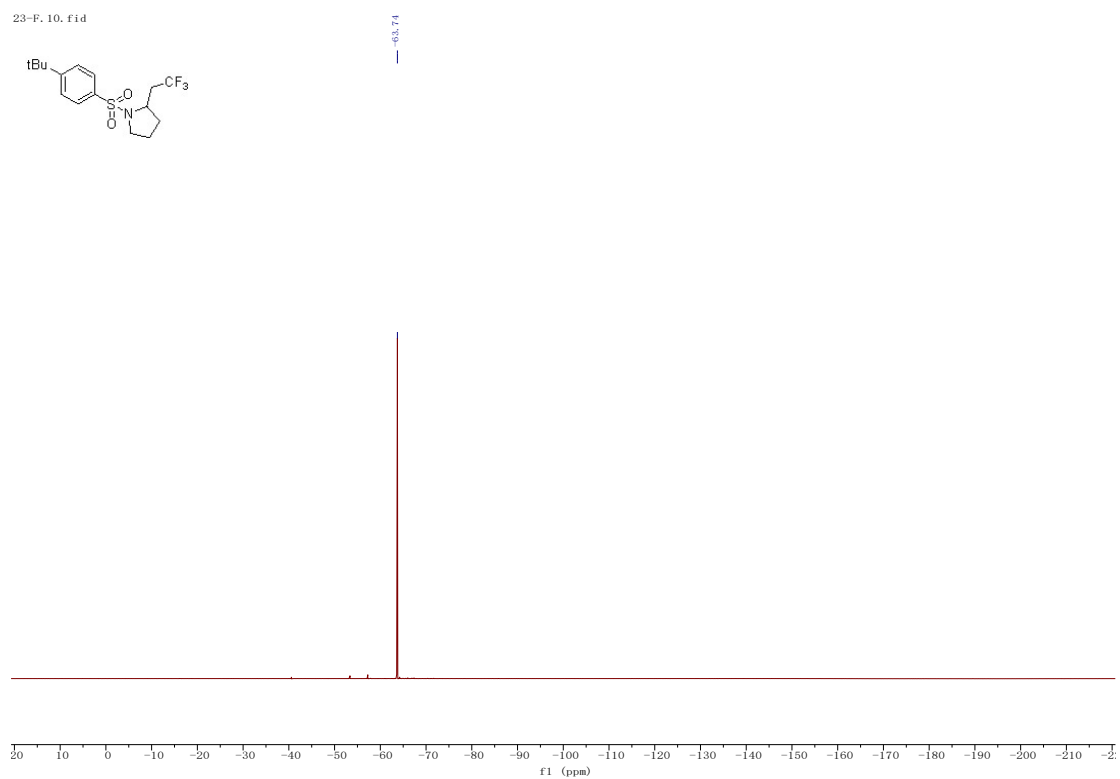

### Figure S10 <sup>1</sup>H NMR spectrum for compound 3d

J3\_10.fid

PROTON CDC13 (D:\Data\cd\20230220) LIU 6

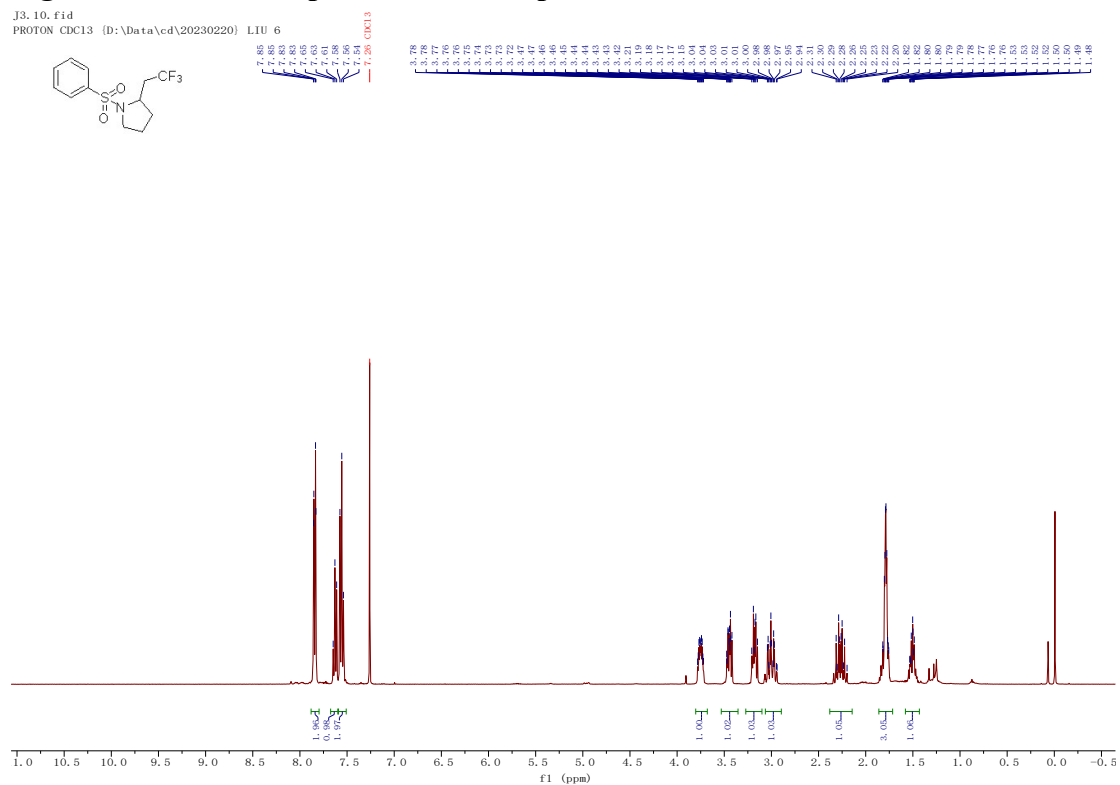

### Figure S11 <sup>13</sup>C NMR spectrum for compound 3d

3\_10.fid

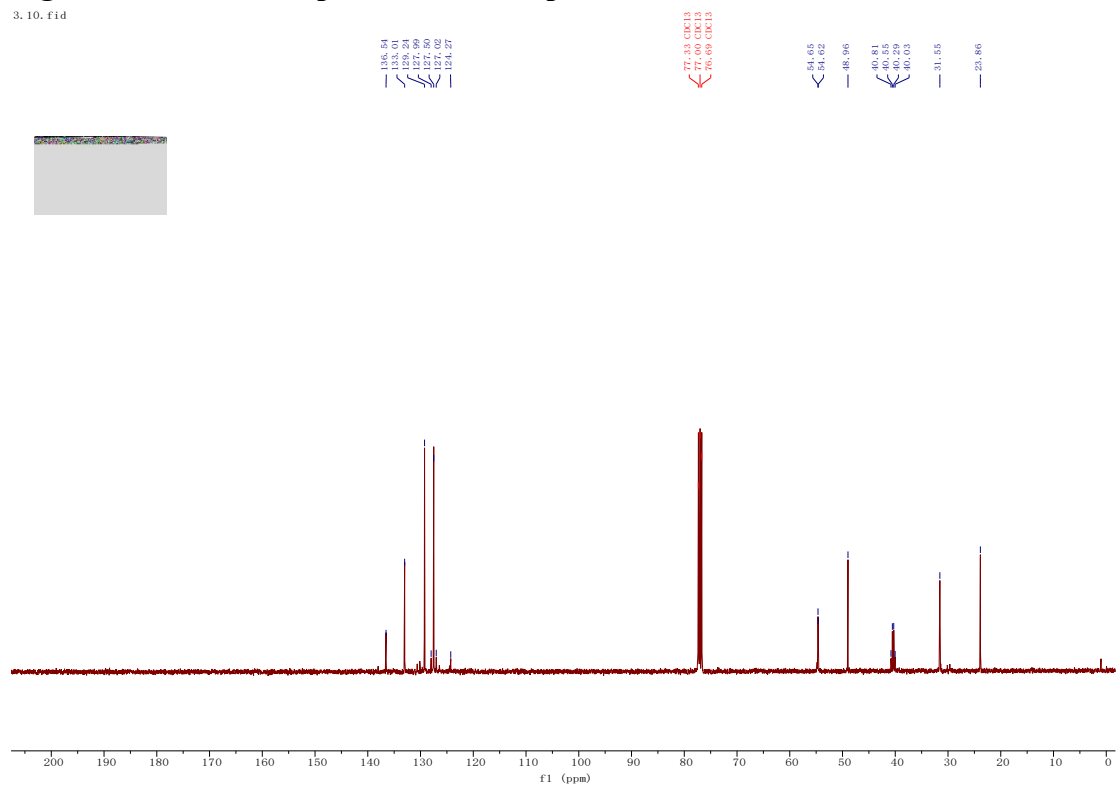

### Figure S12 <sup>19</sup>F NMR spectrum for compound 3d

3-F\_10.fid

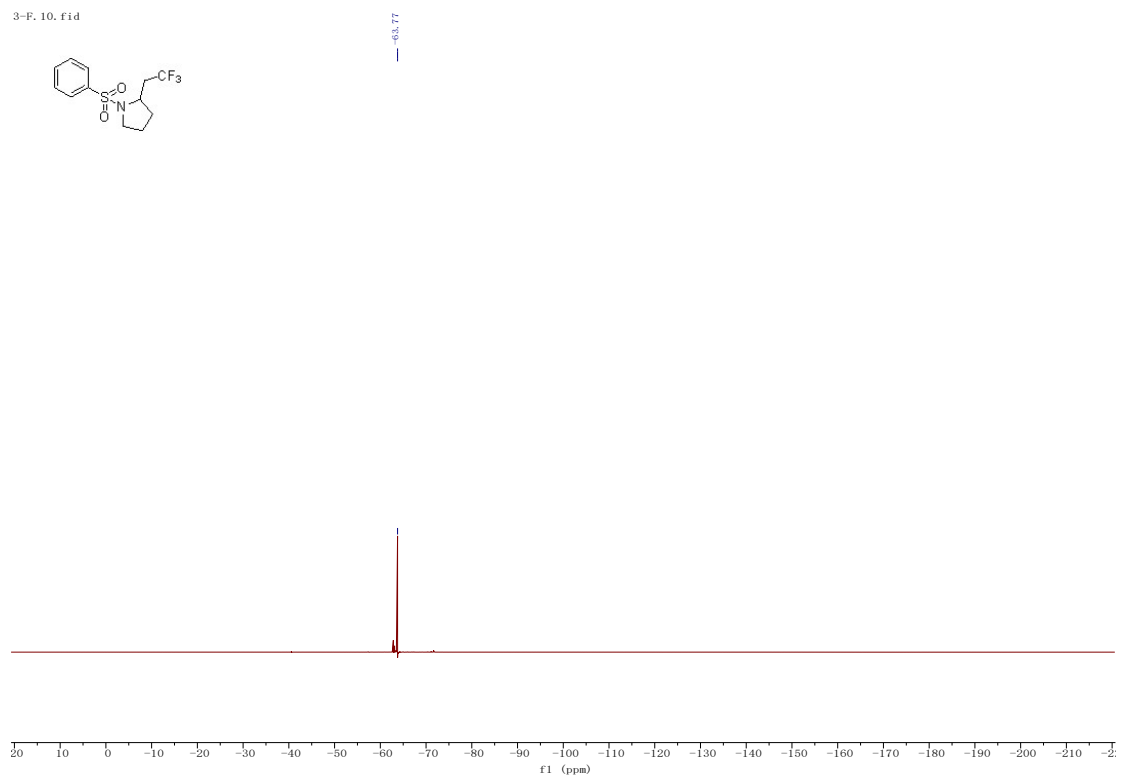

**Figure S13**  $^1\text{H}$  NMR spectrum for compound **3e**

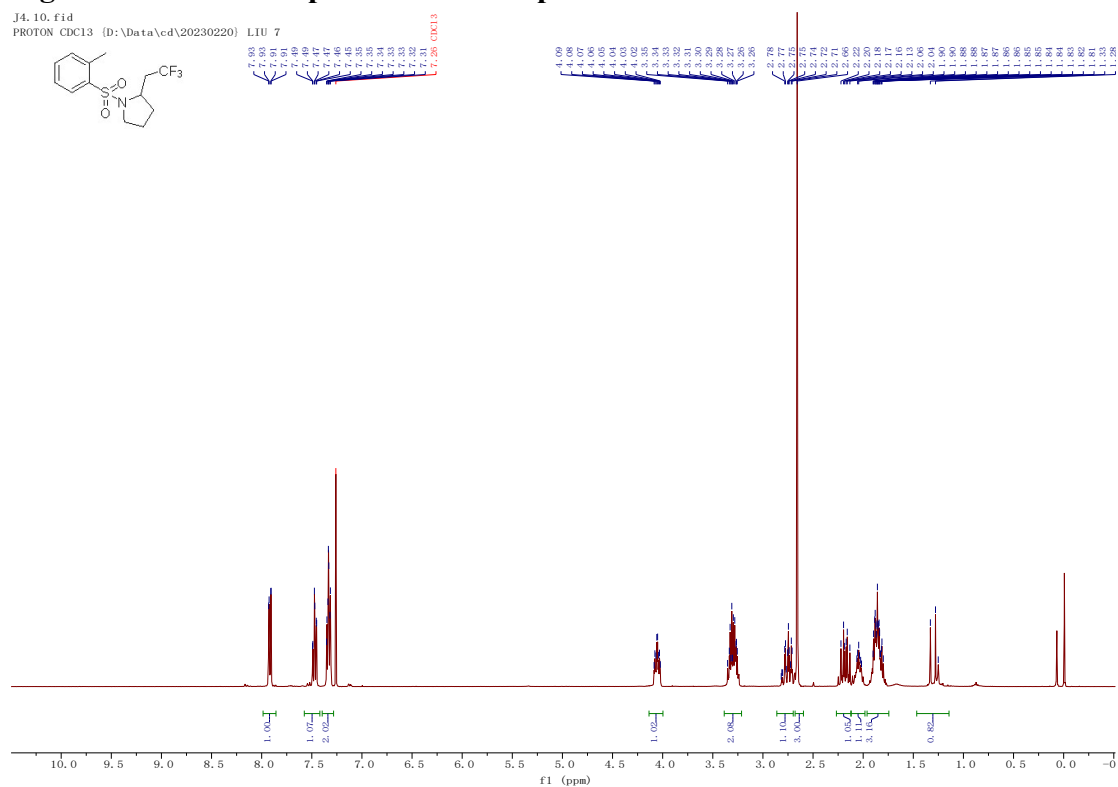

**Figure S14**  $^{13}\text{C}$  NMR spectrum for compound **3e**

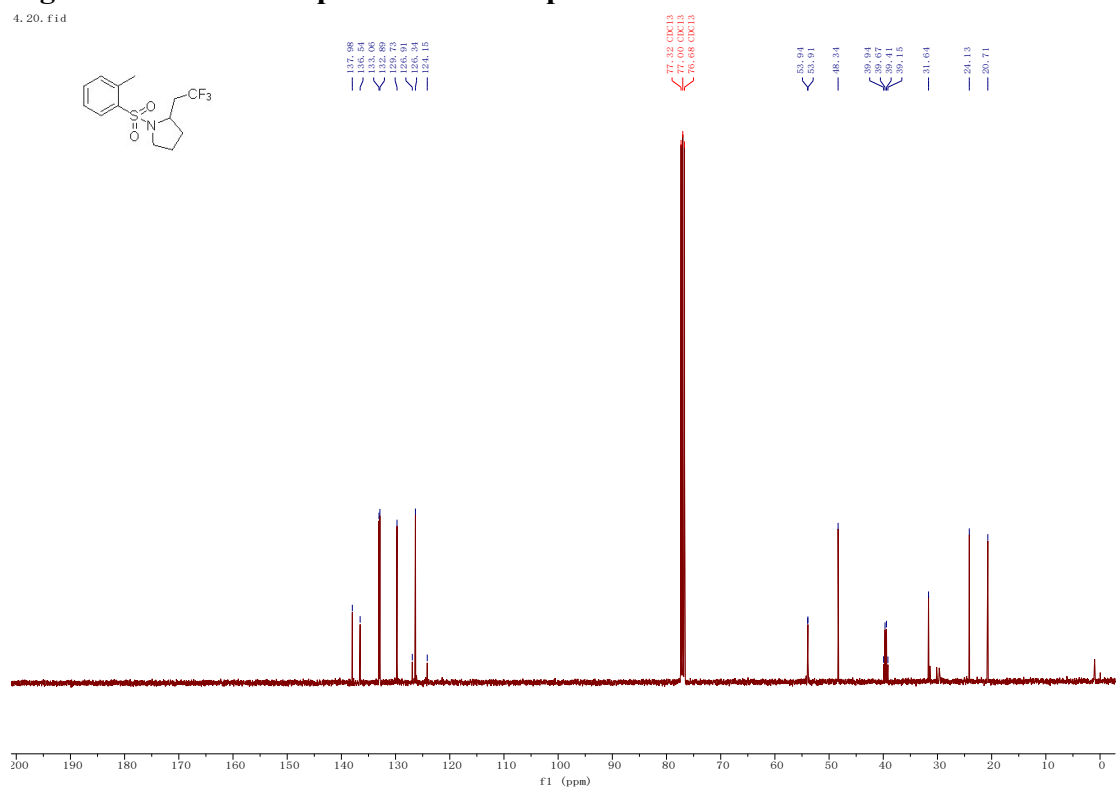

**Figure S15** <sup>19</sup>F NMR spectrum for compound **3e**

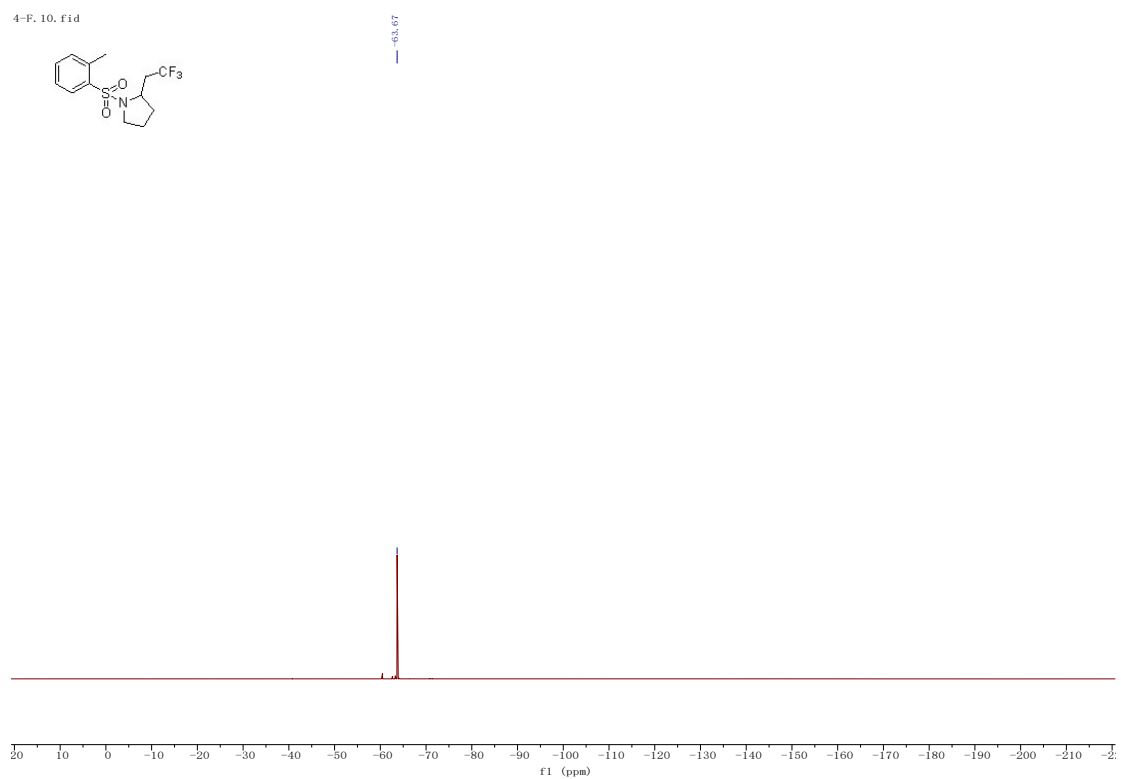

**Figure S16** <sup>1</sup>H NMR spectrum for compound **3f**

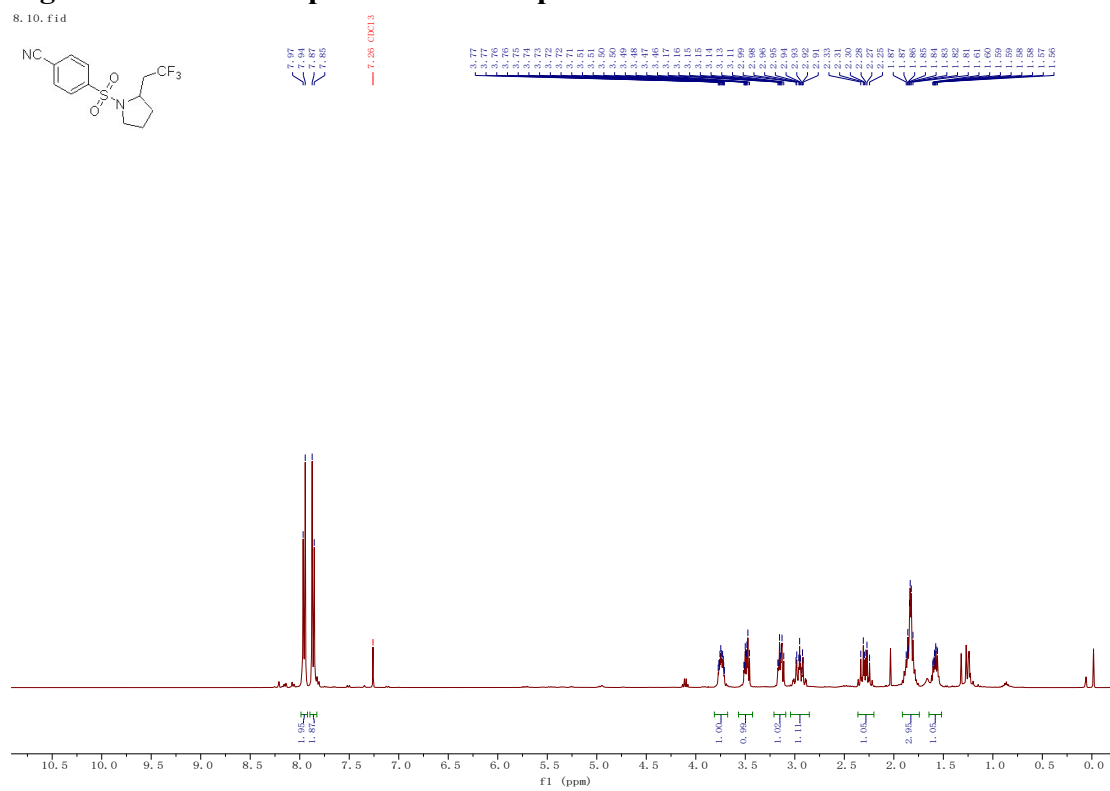

**Figure S17 <sup>13</sup>C NMR spectrum for compound 3f**

8-C. 10. fid

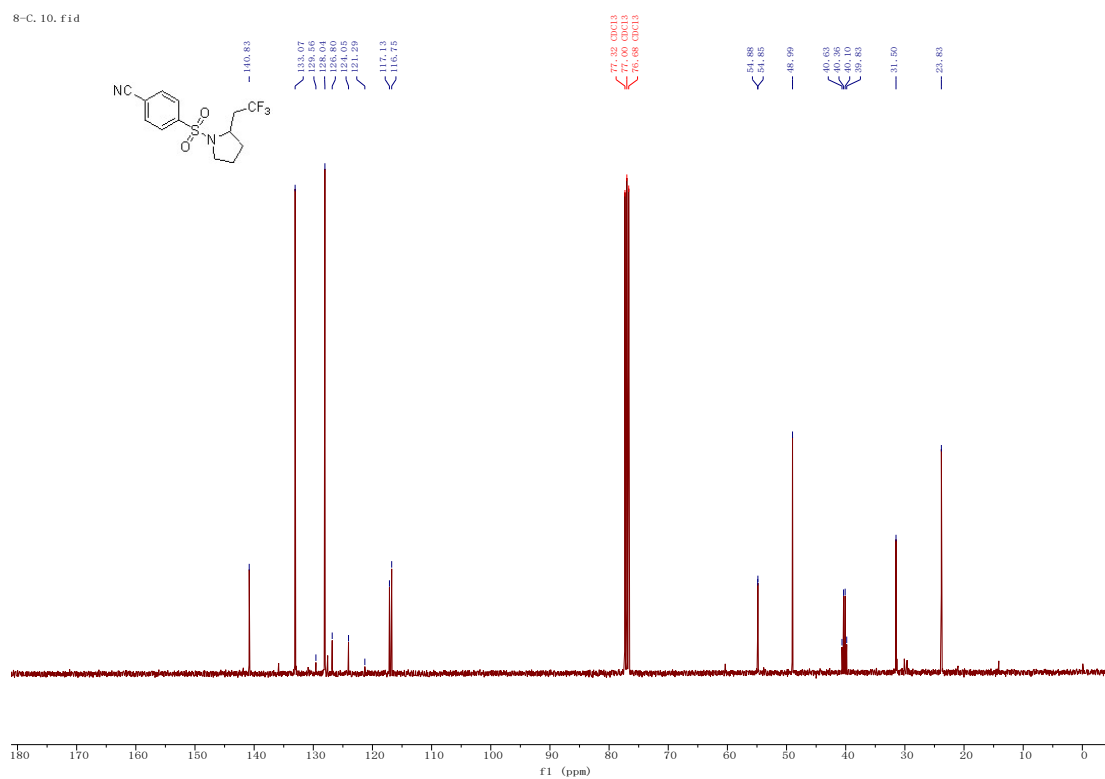

**Figure S18 <sup>19</sup>F NMR spectrum for compound 3f**

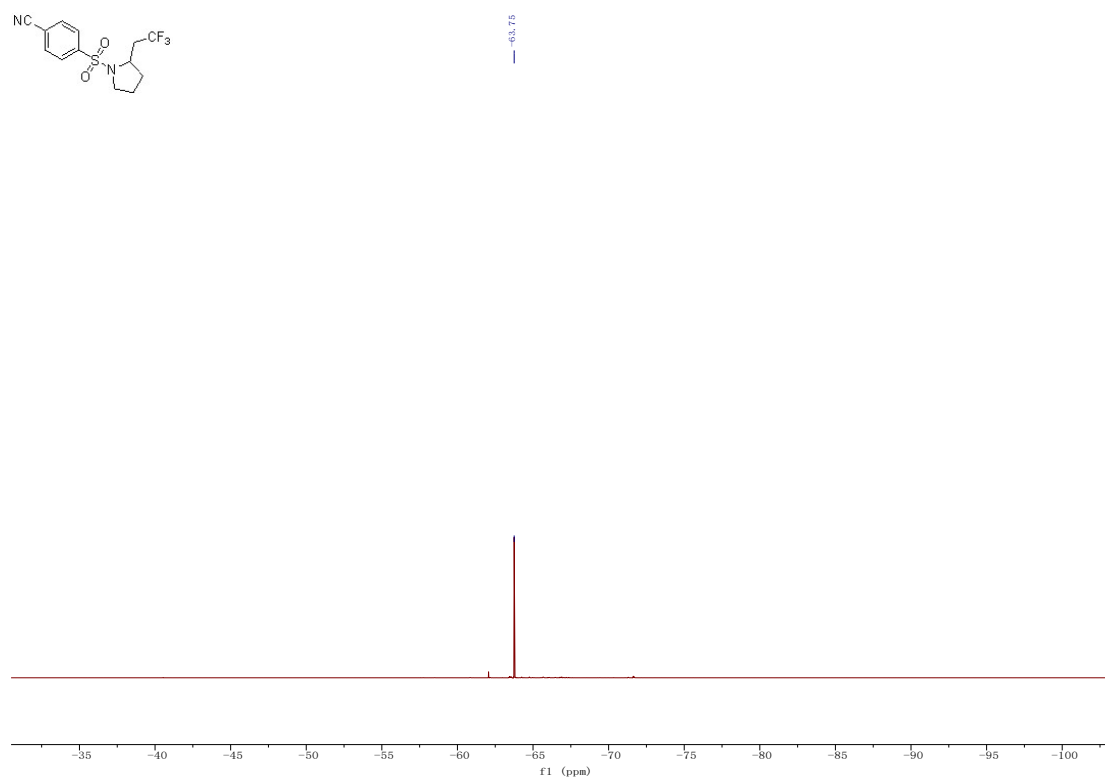



**Figure S19 <sup>1</sup>H NMR spectrum for compound 3g**

7-10. fid

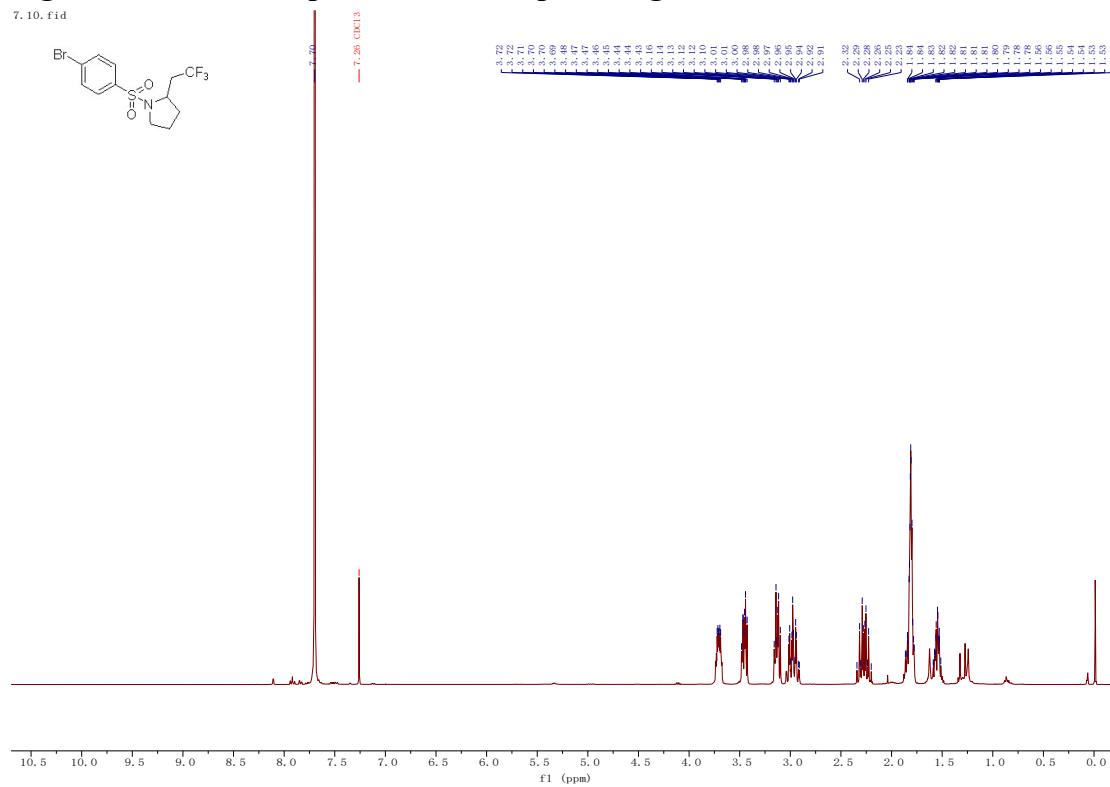

**Figure S20 <sup>13</sup>C NMR spectrum for compound 3g**

7-C-10. fid

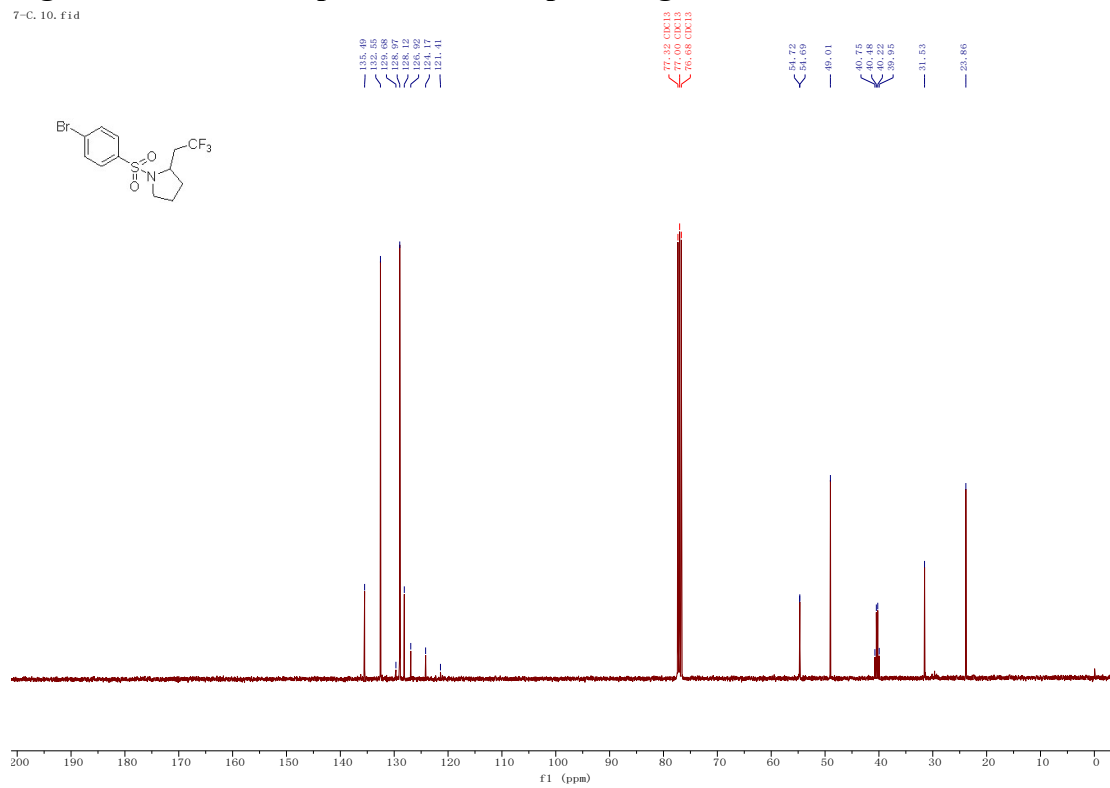

Figure S21 <sup>19</sup>F NMR spectrum for compound 3g

7-F. 10. fid

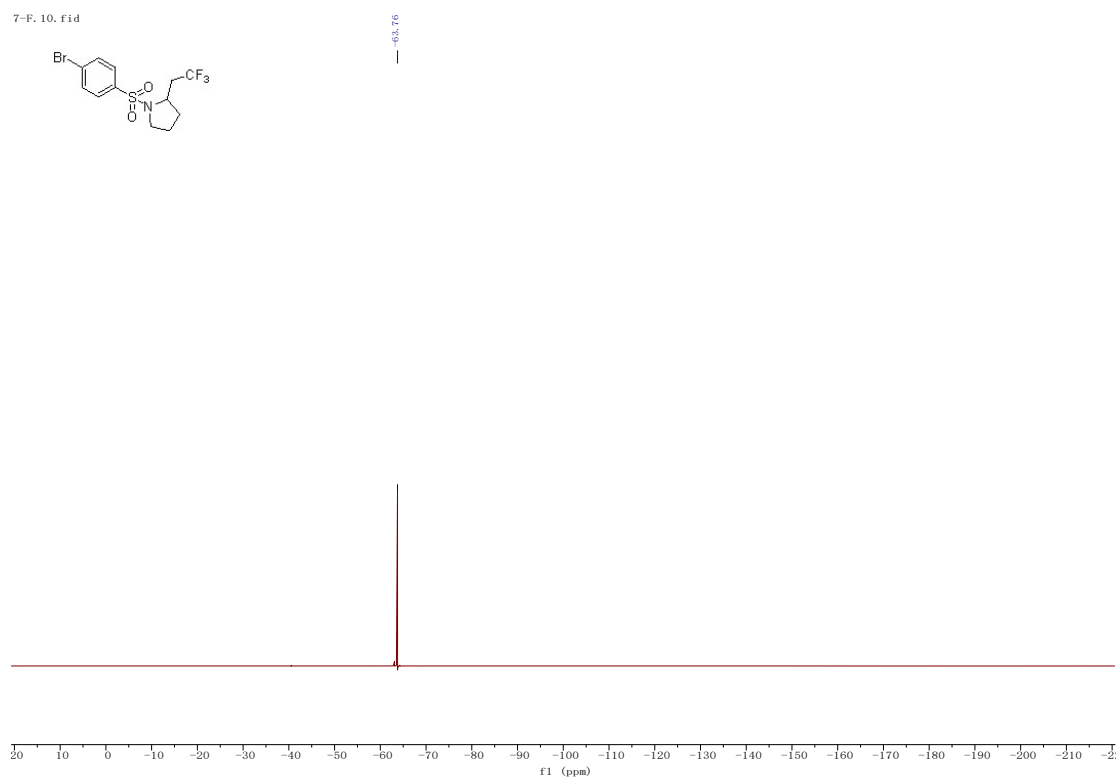

Figure S22 <sup>1</sup>H NMR spectrum for compound 3h

J2. 10. fid

PROTON CDCl3 (D:\Data\cd\20230220) LIU 5

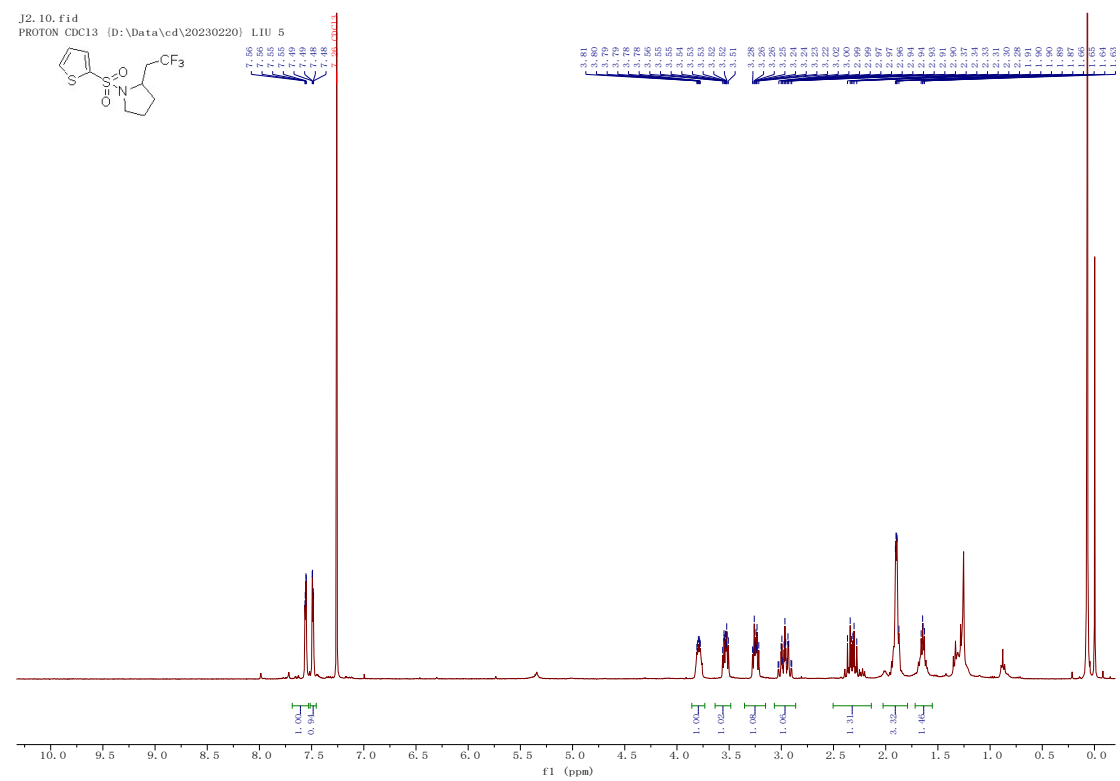

Figure S23 <sup>13</sup>C NMR spectrum for compound 3h

4-C, 10, fid

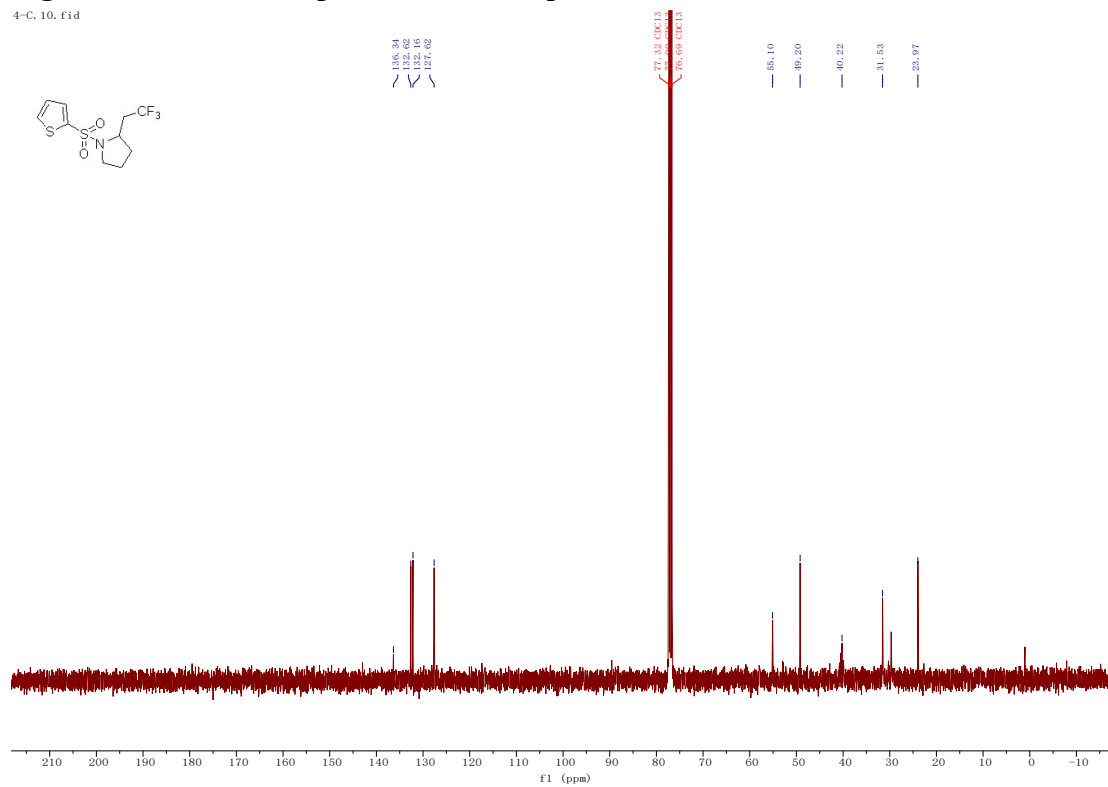

Figure S24 <sup>19</sup>F NMR spectrum for compound 3h

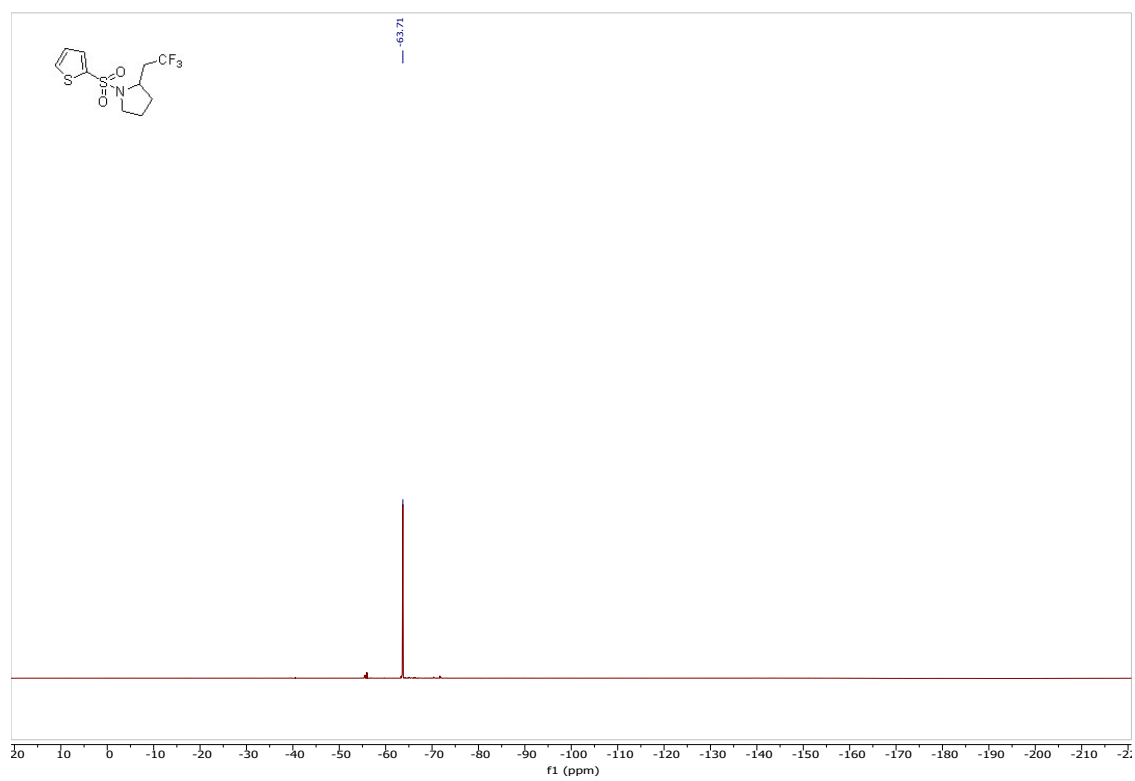

# Figure S25 <sup>1</sup>H NMR spectrum for compound 3i

2023-4-11, 106.fid  
20230411-2-H

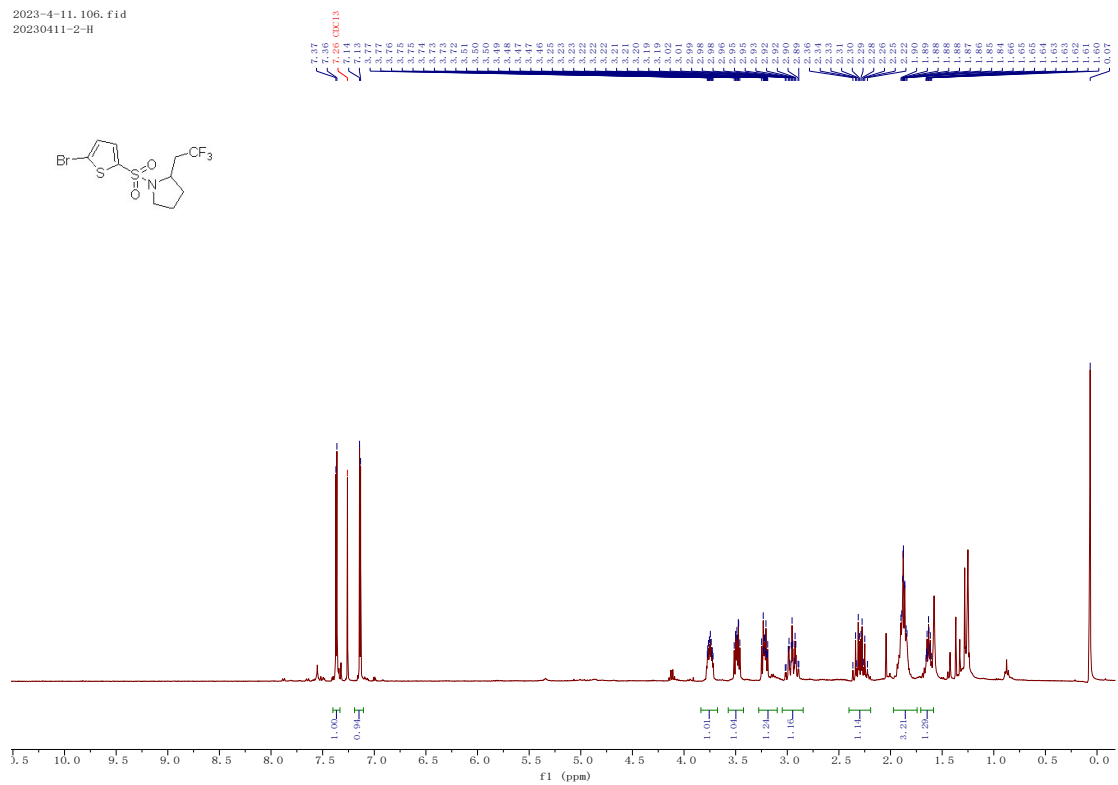

# Figure S26 <sup>13</sup>C NMR spectrum for compound 3i

5-C, 10.fid

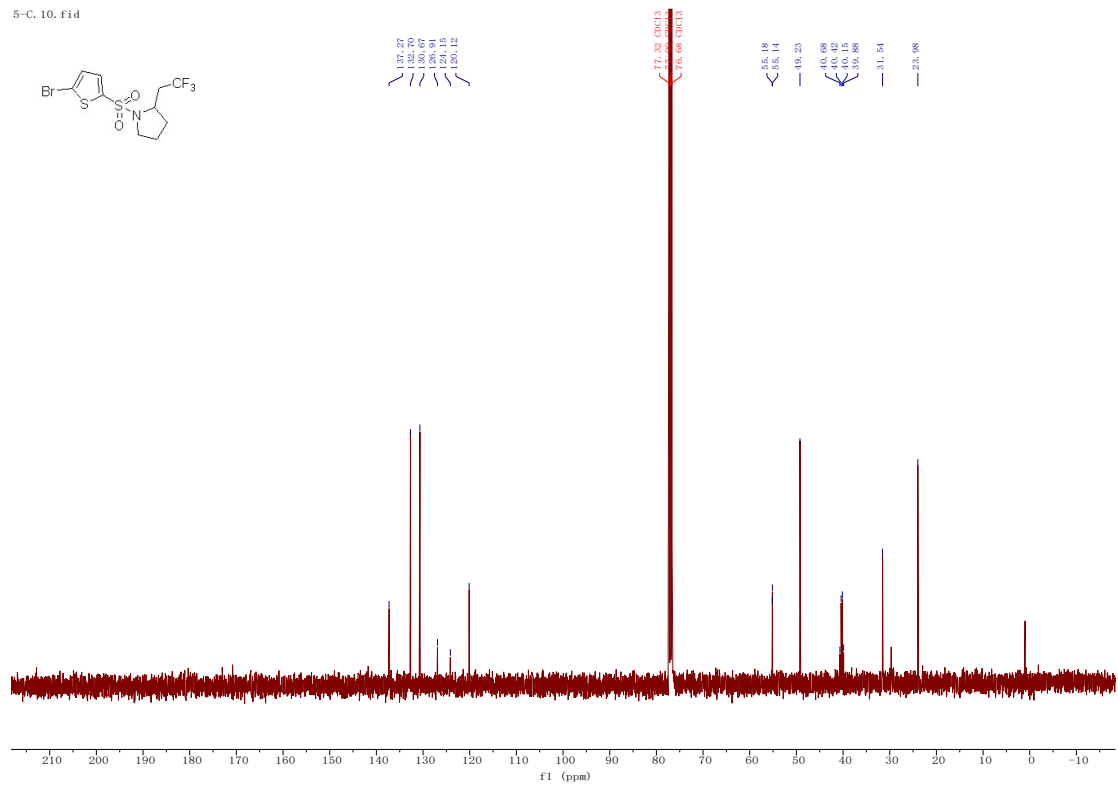

Figure S27 <sup>19</sup>F NMR spectrum for compound 3i

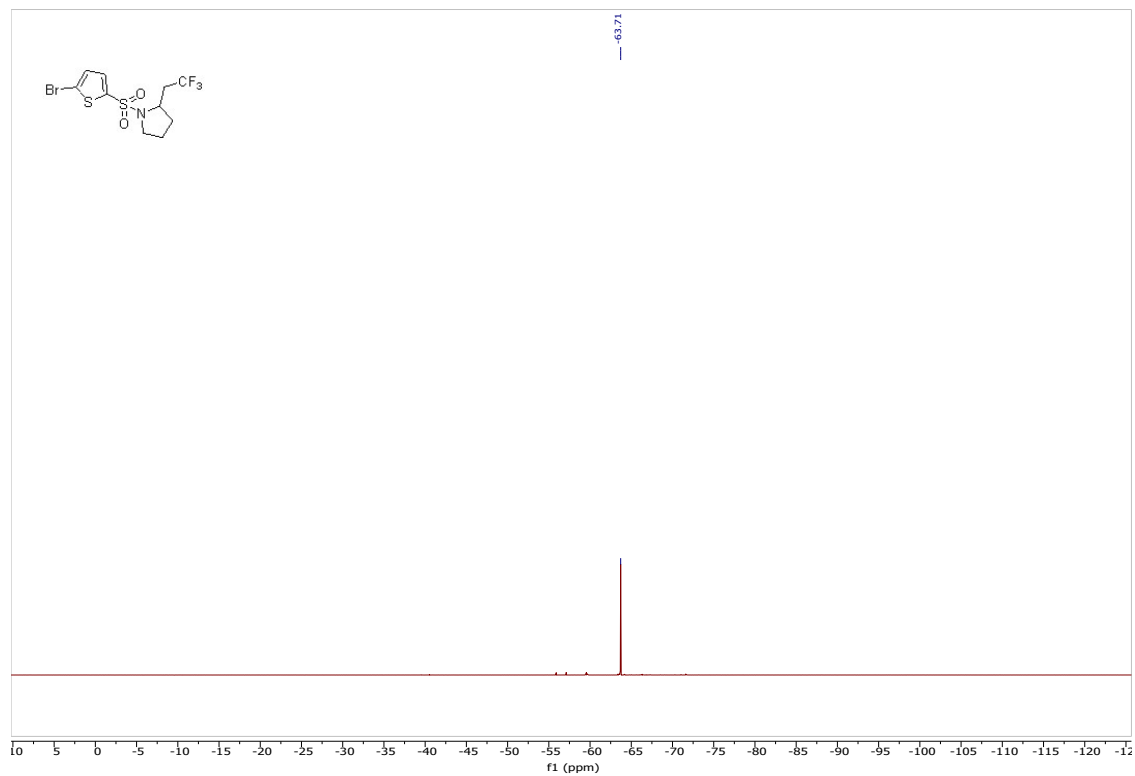

Figure S28 <sup>1</sup>H NMR spectrum for compound 3j

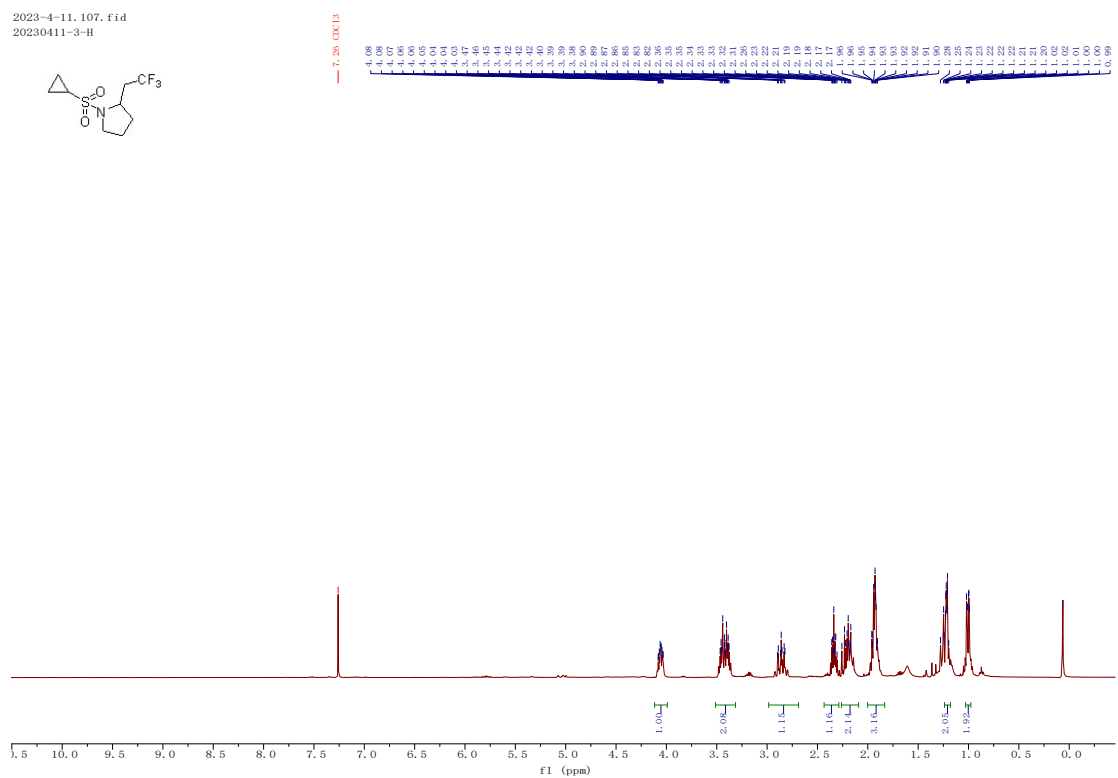

**Figure S29**  $^{13}\text{C}$  NMR spectrum for compound **3j**

6-C. 10. fid

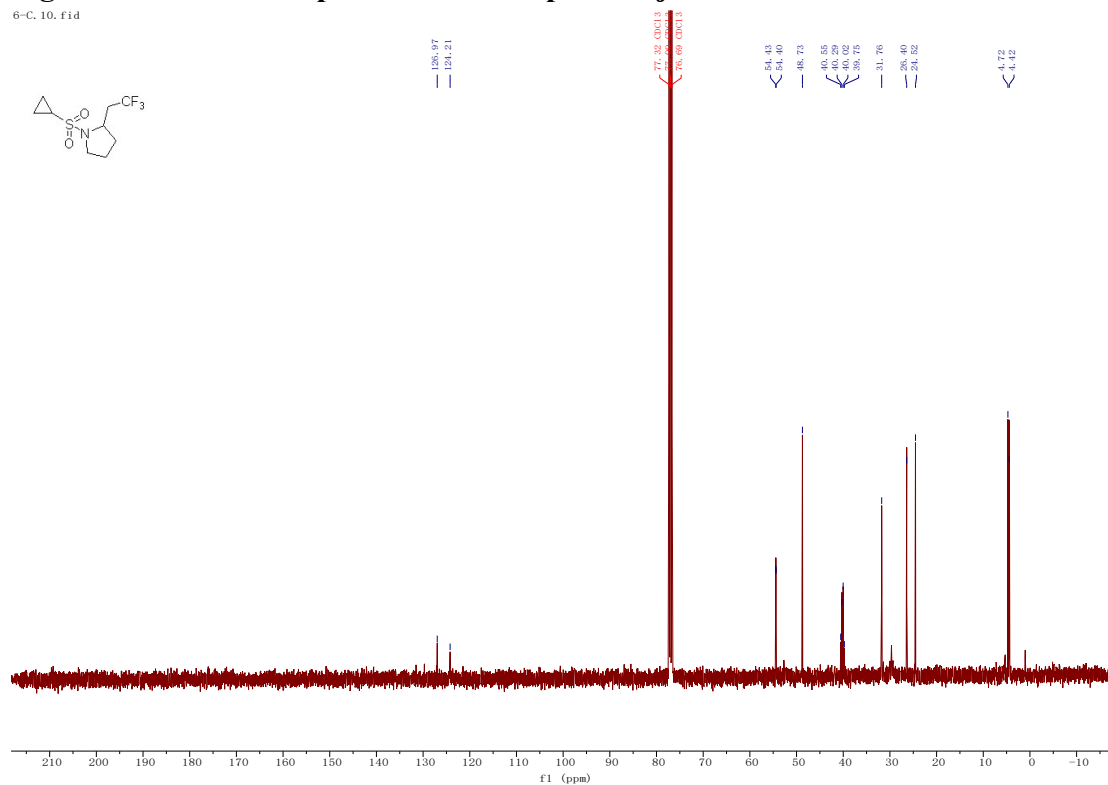

**Figure S30**  $^{19}\text{F}$  NMR spectrum for compound **3j**

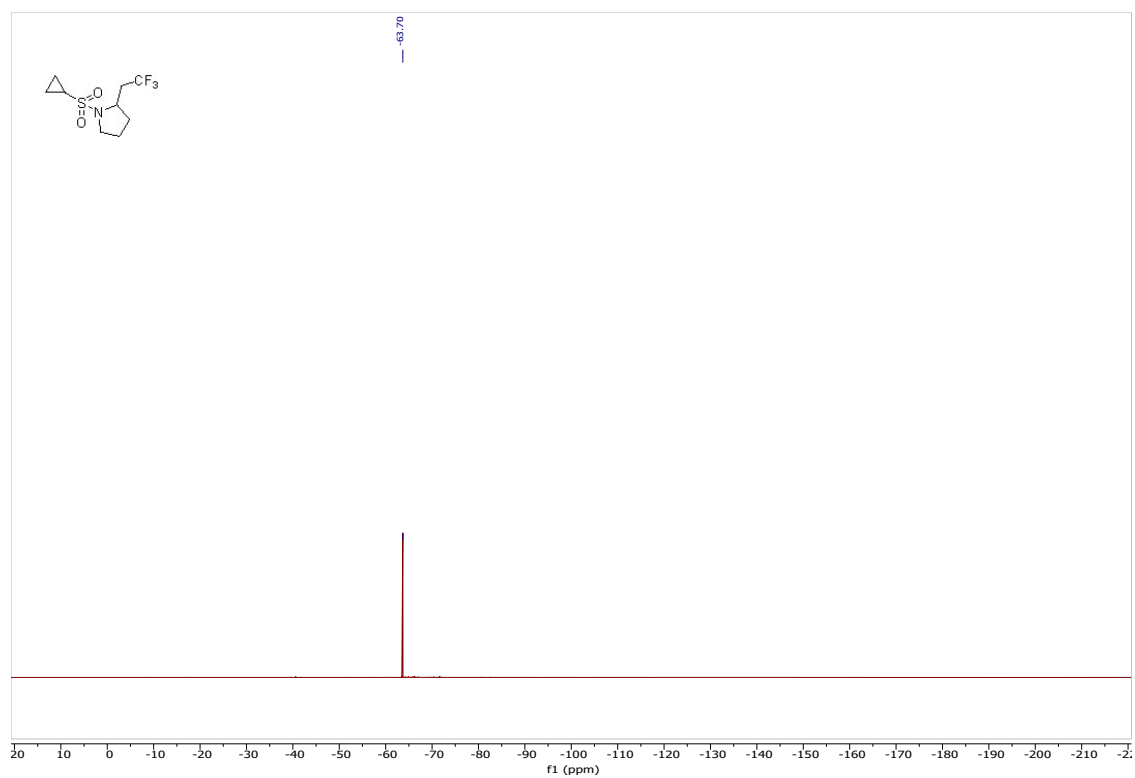

### Figure S31 $^1\text{H}$ NMR spectrum for compound 3l-m

2023-3-11. 93. fid  
20230310-2-H

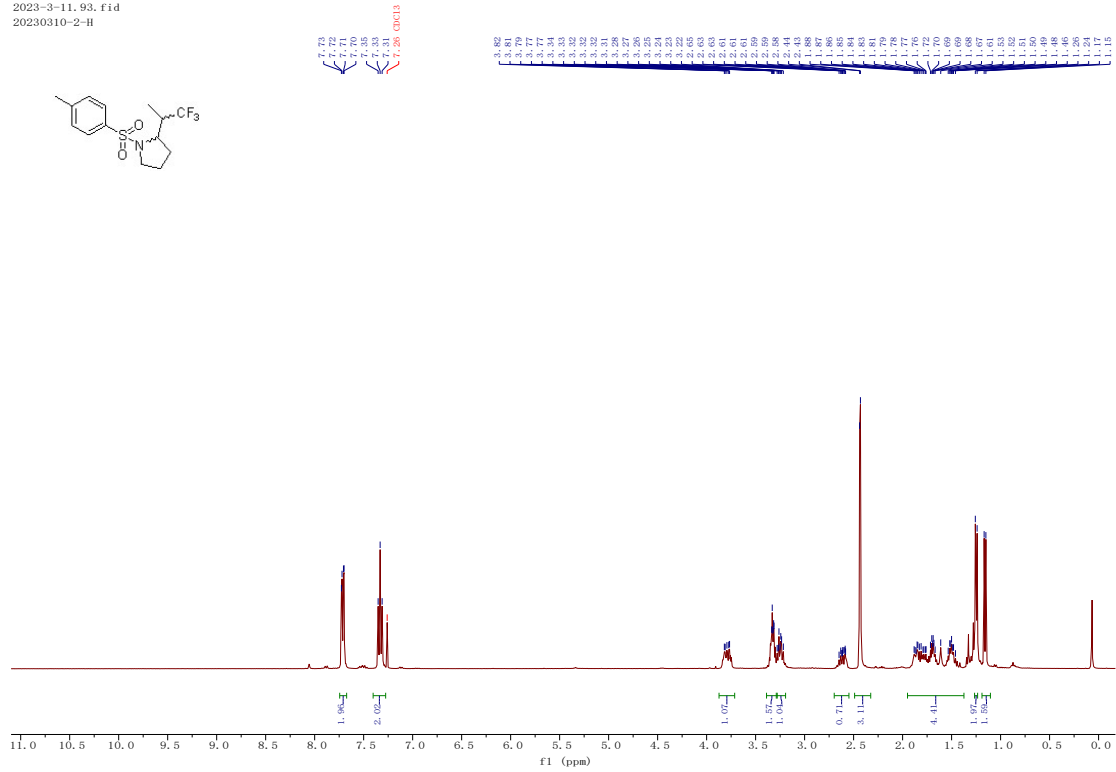

### Figure S32 $^{13}\text{C}$ NMR spectrum for compound 3 l-m

2023-3-11. 95. fid  
20230310-2-C

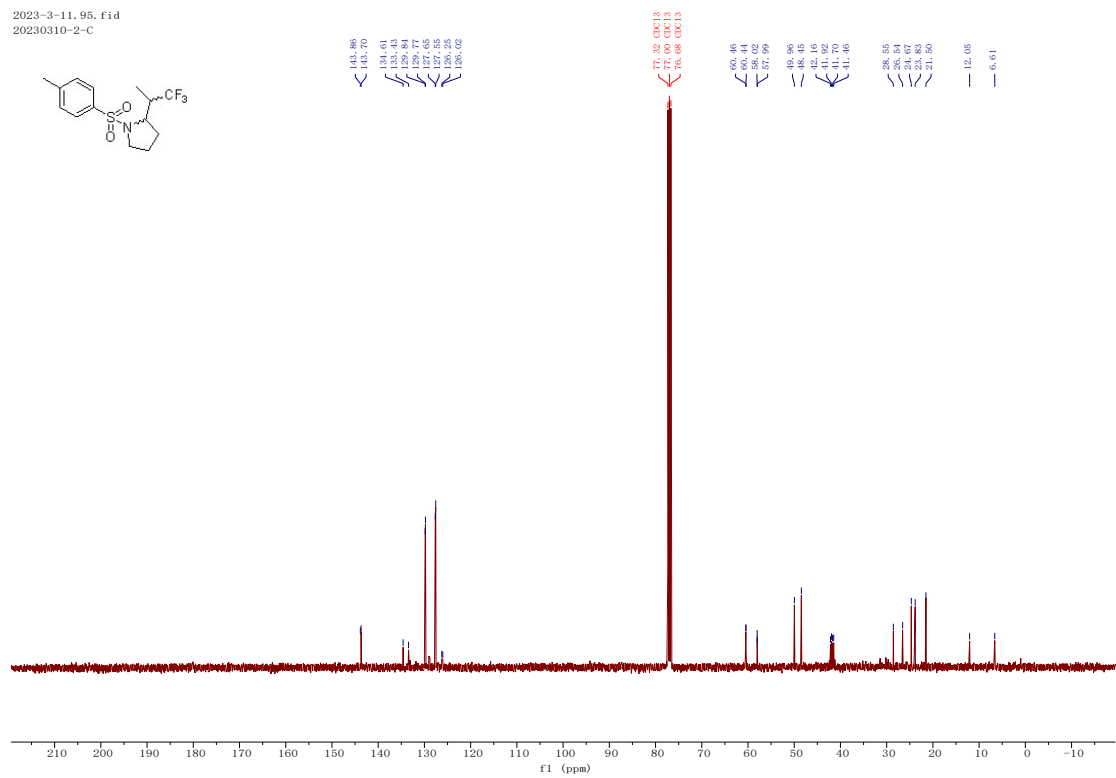

Figure S33 <sup>19</sup>F NMR spectrum for compound 3 l-m

2023-3-11\_94.fid  
20230310-2-F

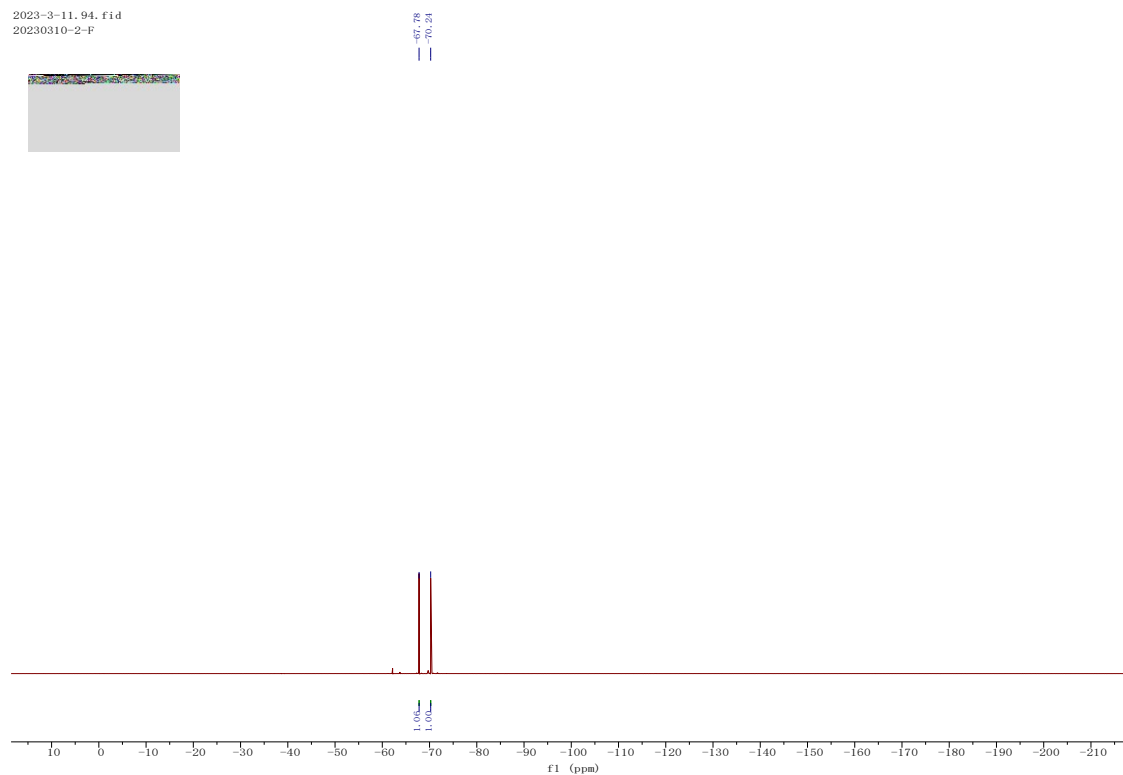

Figure S34 <sup>1</sup>H NMR spectrum for compound 3n

1.10.fid

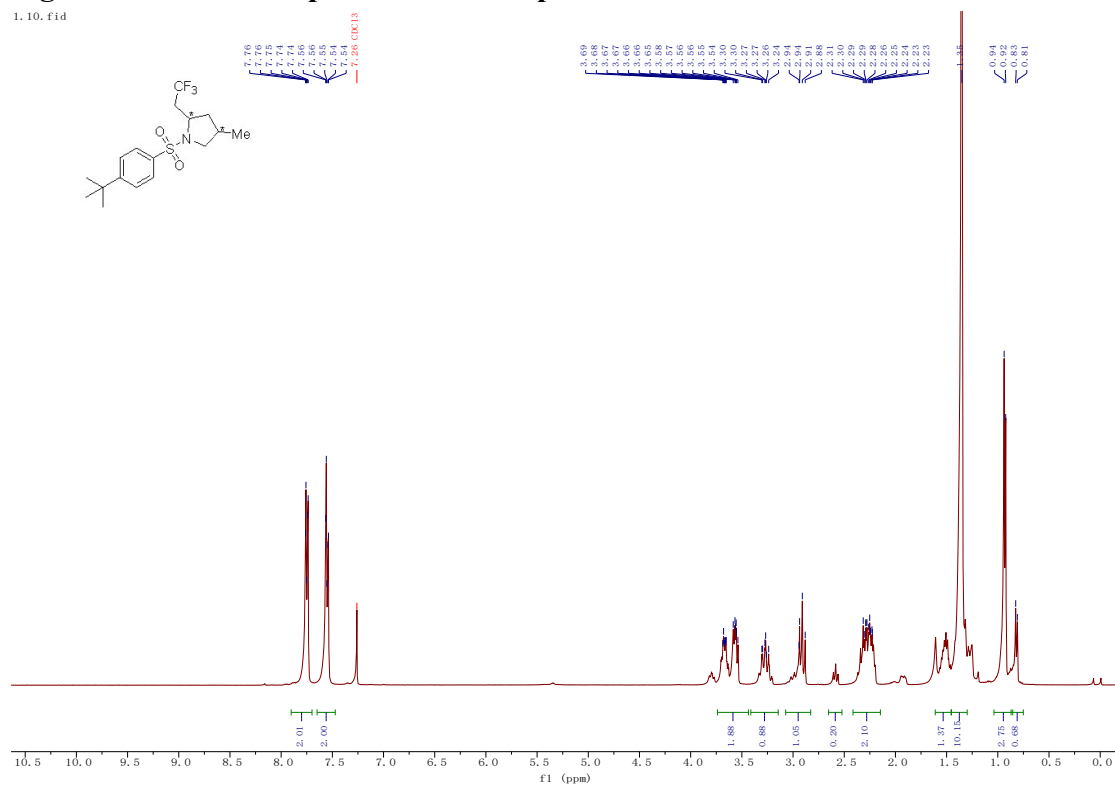



Figure S35  $^{13}\text{C}$  NMR spectrum for compound 3n

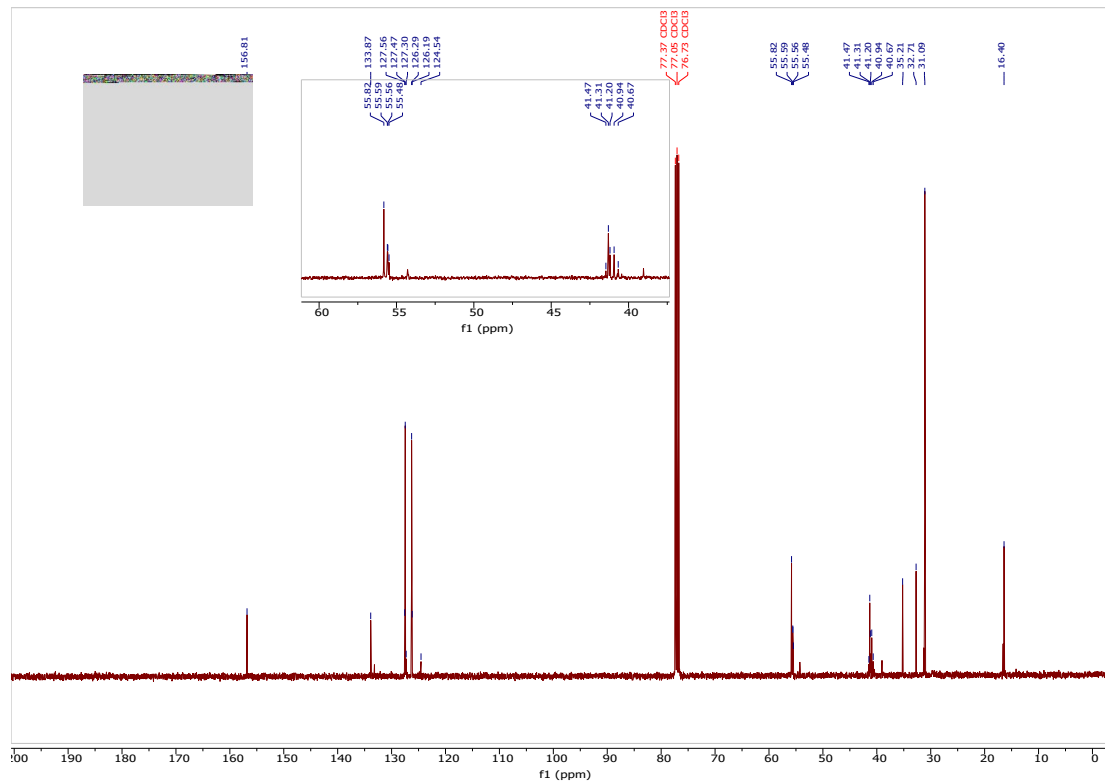

Figure S36  $^{19}\text{F}$  NMR spectrum for compound 3n

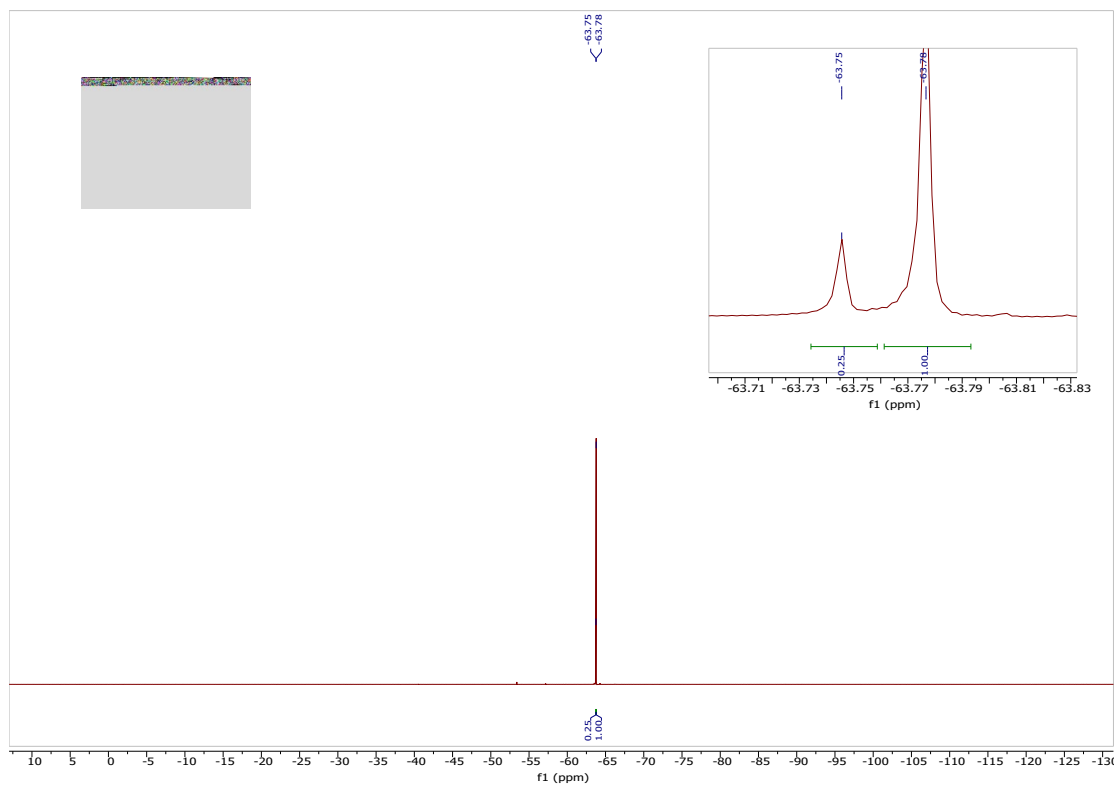

Figure S37  $^1\text{H}$  NMR spectrum for compound 30

2023-3-11\_96.fid  
20230310-3-H

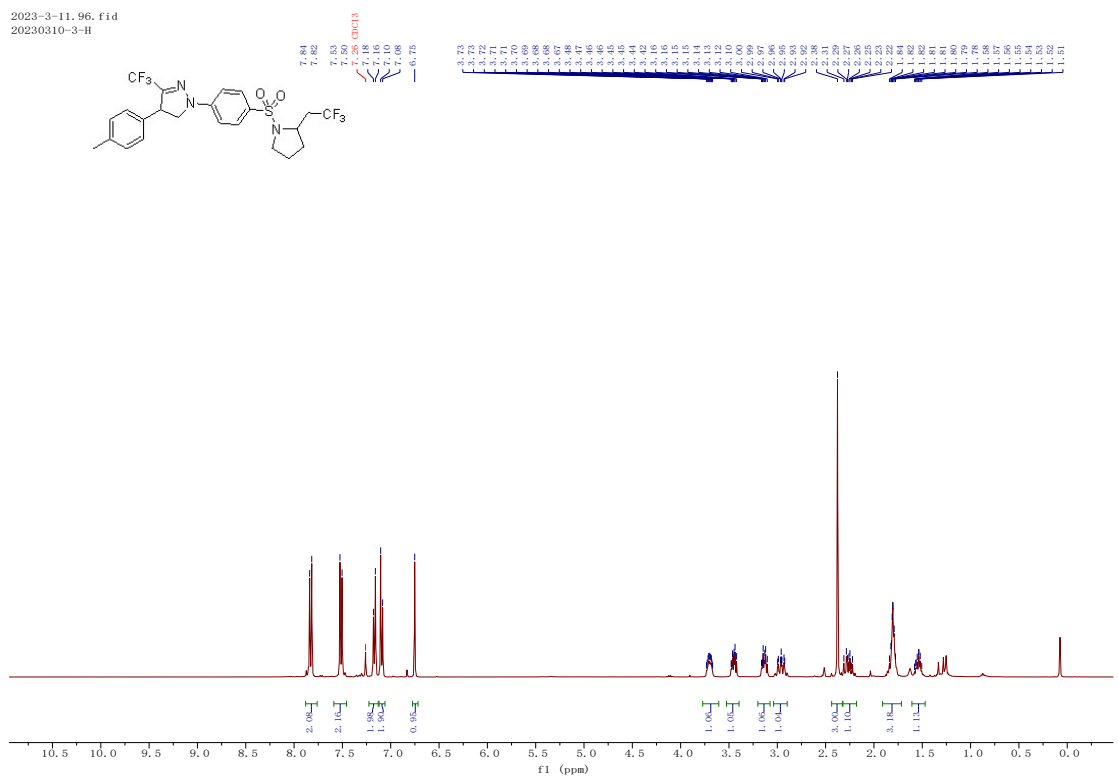

Figure S38  $^{13}\text{C}$  NMR spectrum for compound 30

2023-3-11\_99.fid  
20230310-3-C

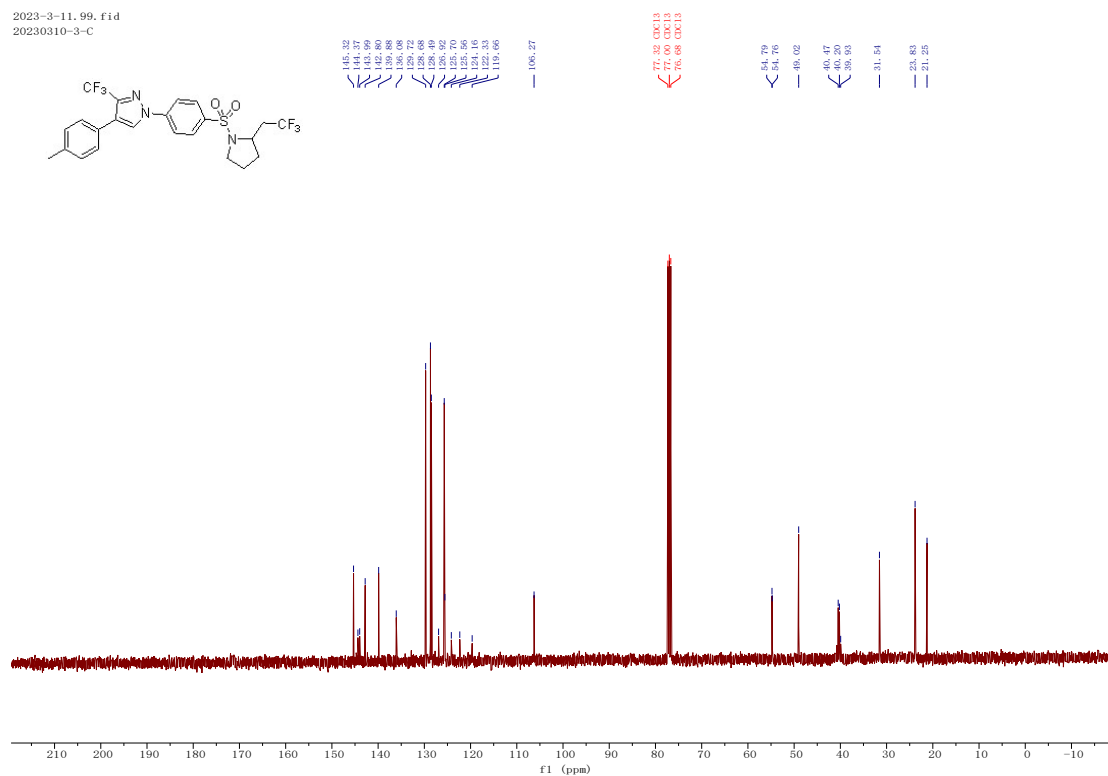

**Figure S39  $^{19}\text{F}$  NMR spectrum for compound 30**

2023-3-11\_97.fid  
20230310-3-F

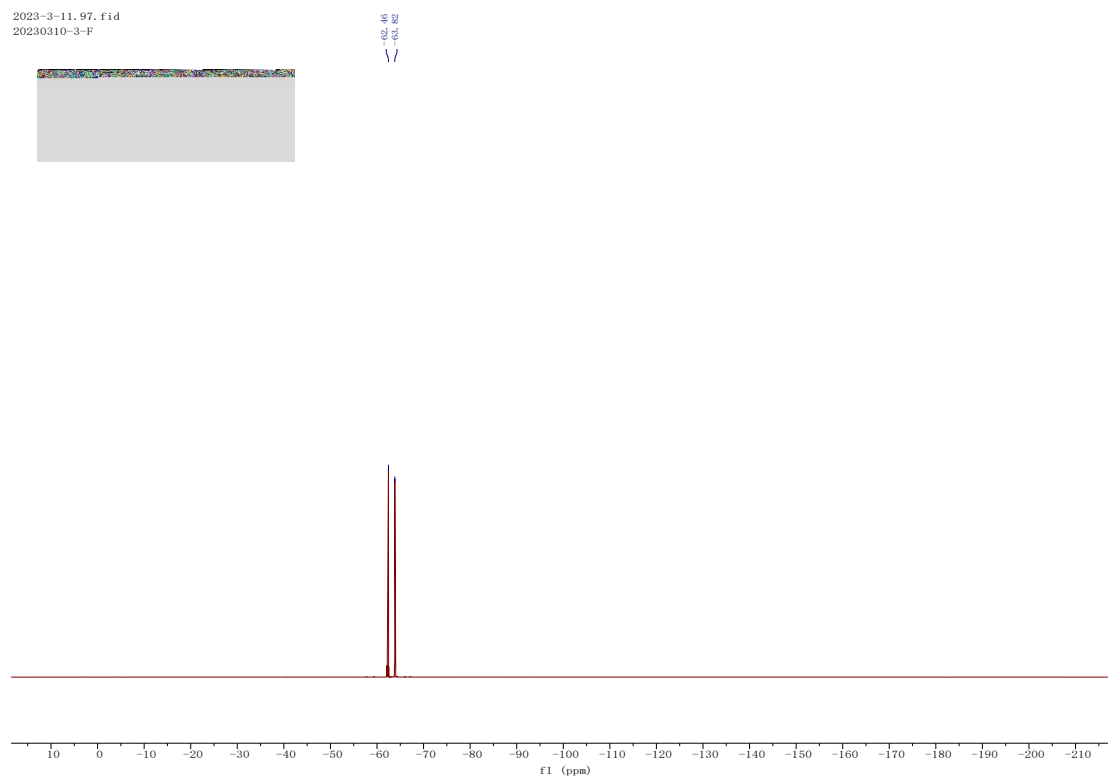

**Figure S40  $^1\text{H}$  NMR spectrum for compound 4a**

2023-5-11\_131.fid  
20230511-5-H

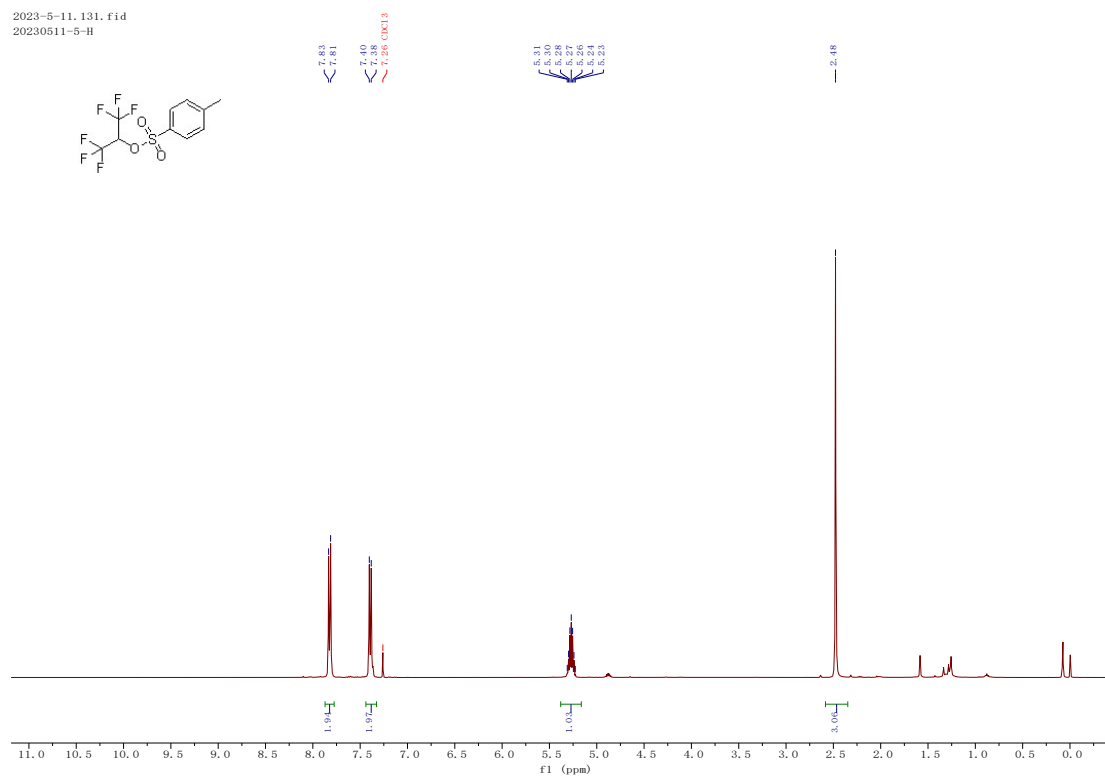

Figure S41 <sup>13</sup>C NMR spectrum for compound 4a

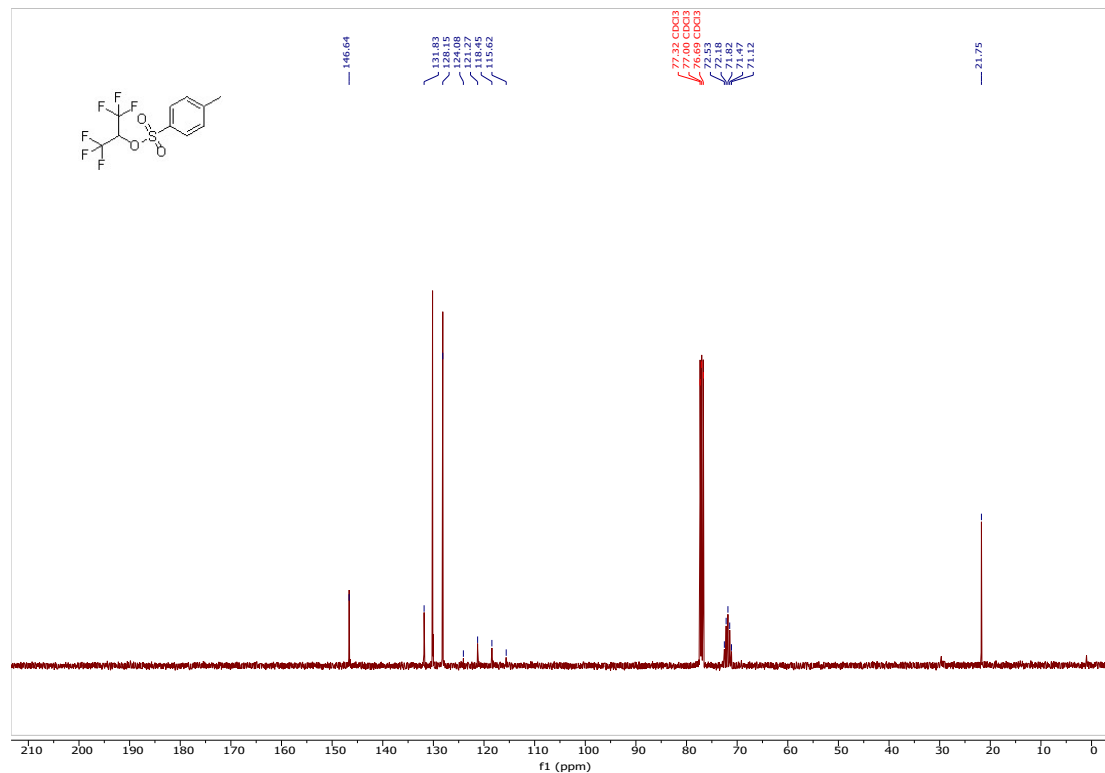

Figure S42 <sup>19</sup>F NMR spectrum for compound 4a

2023-12-14\_267.fid  
20231214-1-F

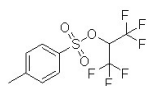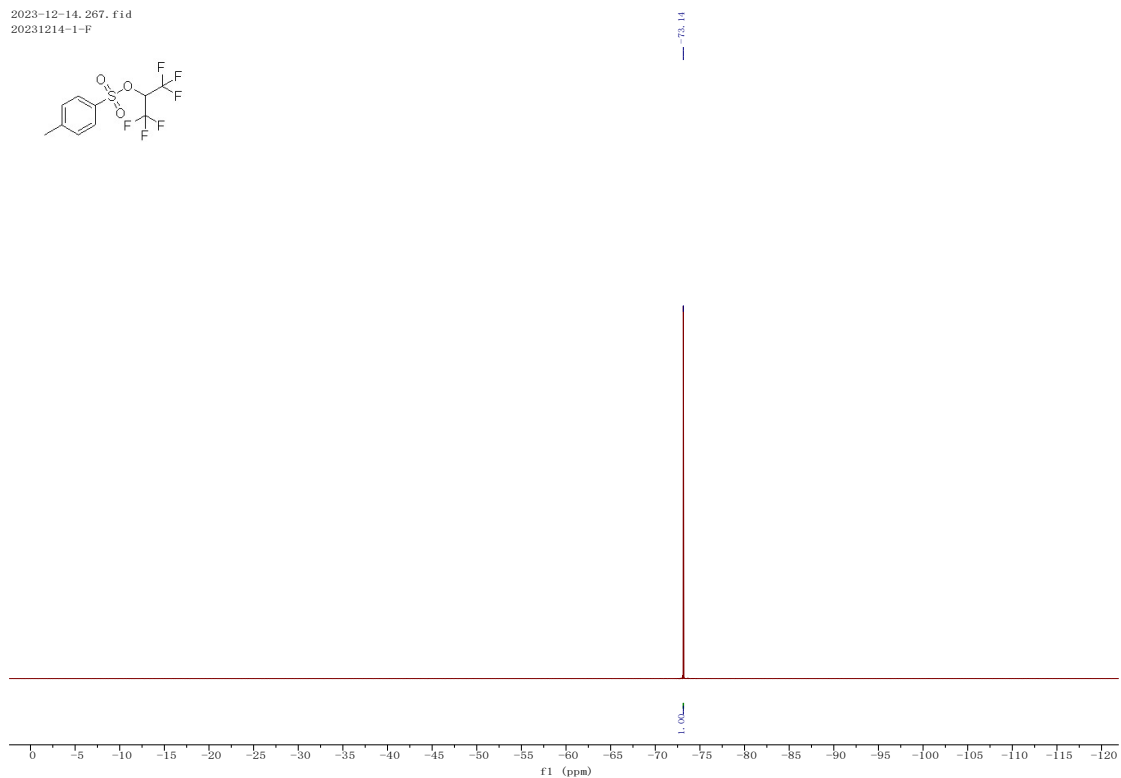

Supplement: d3nj04705a1.pdf [file d3nj04705a1.pdf]
